# Supplementary material for: CuI/1,10-phen/PEG promoted decarboxylation of 2,3-diarylacrylic acids: synthesis of stilbenes under neutral and microwave conditions with an in situ generated recyclable catalyst
Source: Royal Society of Chemistry journal article supplement (doi:10.1039/c3ob41588k), 2013-01-01
Supplement: c3ob41588k.pdf [file c3ob41588k.pdf]

# CuI/1,10-Phen/PEG Promoted Decarboxylation of 2, 3-Diarylacrylic acids: Synthesis of Stilbenes under Neutral and Microwave Conditions with in situ Generated Recyclable Catalyst

Yong Zou,<sup>\*a</sup> Qi Huang,<sup>a,b</sup> Tong-kun Huang,<sup>a</sup> Qing-chun Ni,<sup>c</sup> En-sheng Zhang,<sup>a,b</sup> Tian-long Xu,<sup>a,b</sup> Mu Yuan<sup>d</sup>

<sup>a</sup> Guangzhou Institute of Chemistry, Chinese Academy of Sciences, Guangzhou 510650, P. R. China

<sup>b</sup> University of Chinese Academy of Sciences, Beijing 100039, P. R. China

<sup>c</sup> Guangzhou General Pharmaceutical Research Institute, Guangzhou 510240, P. R. China

<sup>d</sup> Guangzhou Medical University, Guangzhou 510182, P. R. China

Tel: +86-20-85231309; Fax: +86-20-85231119. E-mail: zou\_jinan@163.com

## Supporting Materials

### Content

|                                                              |   |
|--------------------------------------------------------------|---|
| General .....                                                | 1 |
| Drawing of the crystal structure of 2g .....                 | 1 |
| Recyclability of [CuI(1,10-Phen)] <sub>2</sub> .....         | 2 |
| Characterization data of [CuI(1,10-phen)] <sub>2</sub> ..... | 2 |
| Spectra for products (1a, 1r and 2a-2s) .....                | 7 |

## 1. General

2,3-Diaryl acrylic acids were directly obtained through Perkin reaction except **1a** and **1r**. Other reagents and chromatography grade solvents were obtained from commercial sources and used without further purification unless otherwise stated. Petroleum ether (PE) used refers to the boiling fraction of 60–90 °C. All microwave assisted reactions were carried out with Microwave Synthesizer (WBFY-205, Gongyi City Yu Hua Instrument Co. Ltd, China), and the reaction temperature was detected by infrared thermometer. The melting points are uncorrected.  $^1\text{H}$  NMR and  $^{13}\text{C}$  NMR spectra were measured on a 400 MHz spectrometer ( $^1\text{H}$  400 MHz,  $^{13}\text{C}$  100 MHz) using  $\text{CDCl}_3$  or  $\text{DMSO-d}_6$  as the solvent at room temperature. Chemical shifts are reported in parts per million (ppm) and are calibrated using residual undeuterated solvent as an internal reference. HRMS spectra were recorded on a LC-Q-TOF (ESI) apparatus. The single X-ray diffraction measurement was performed on X-ray diffractometer. The morphology was characterized using scanning electron microscopy (SEM, 15 kV). Thermogravimetric analysis (TGA) was carried out with a heating rate of 3 deg/min in a flowing argon atmosphere.

## 2. Drawing of the crystal structure of **2g**

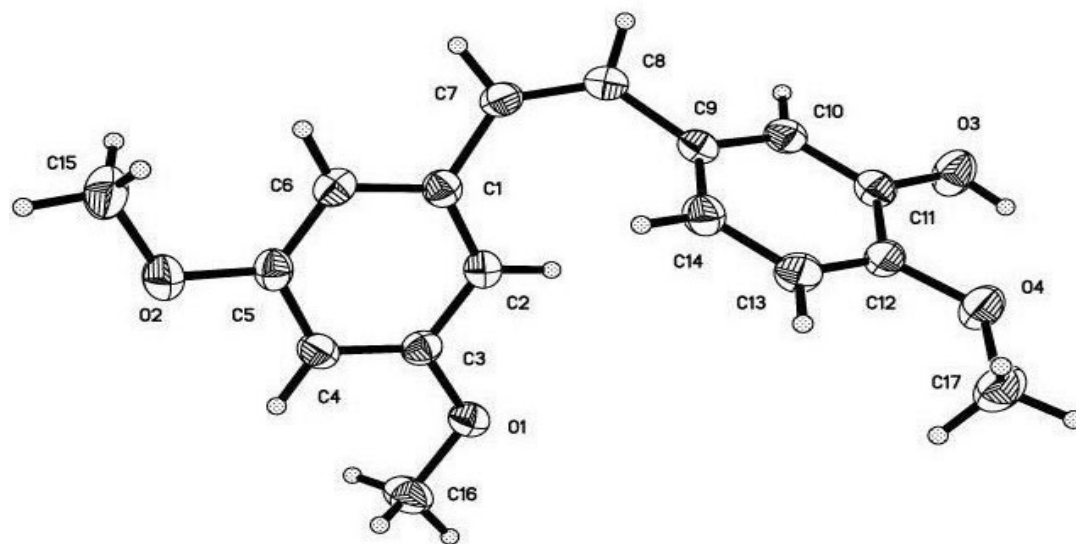

Figure 1 X-ray crystal structure of **2g**

**Table S1 Recyclability of [CuI(1,10-Phen)]<sub>2</sub>**

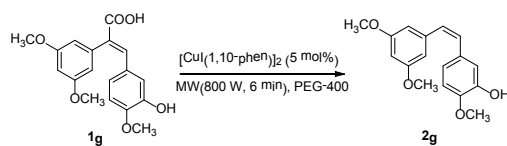

| Run            | Catalyst recovery(%) | T/min | Product yield(%) |
|----------------|----------------------|-------|------------------|
| 1 <sup>a</sup> | 87                   | 6     | 84               |
| 2 <sup>b</sup> | 86                   | 6     | 83               |
| 3 <sup>b</sup> | 85                   | 6     | 82               |
| 4 <sup>b</sup> | 85                   | 6     | 82               |
| 5 <sup>b</sup> | 85                   | 6     | 82               |

<sup>a</sup> Reaction condition: **1g** (50 mmol), [CuI(1,10-phen)]<sub>2</sub> (5 mol %) which was recovered from initial reaction, PEG-400 (100 ml), under N<sub>2</sub> atmosphere, the mixture was stirred under microwave irradiation (800 W, 180-190 °C) for 6 min (2-min irradiation each time with a 5-min interval between). <sup>b</sup>The recovered catalyst was used under identical reaction conditions to those for the first run.

### 3. Characterization data of [CuI(1,10-phen)]<sub>2</sub>

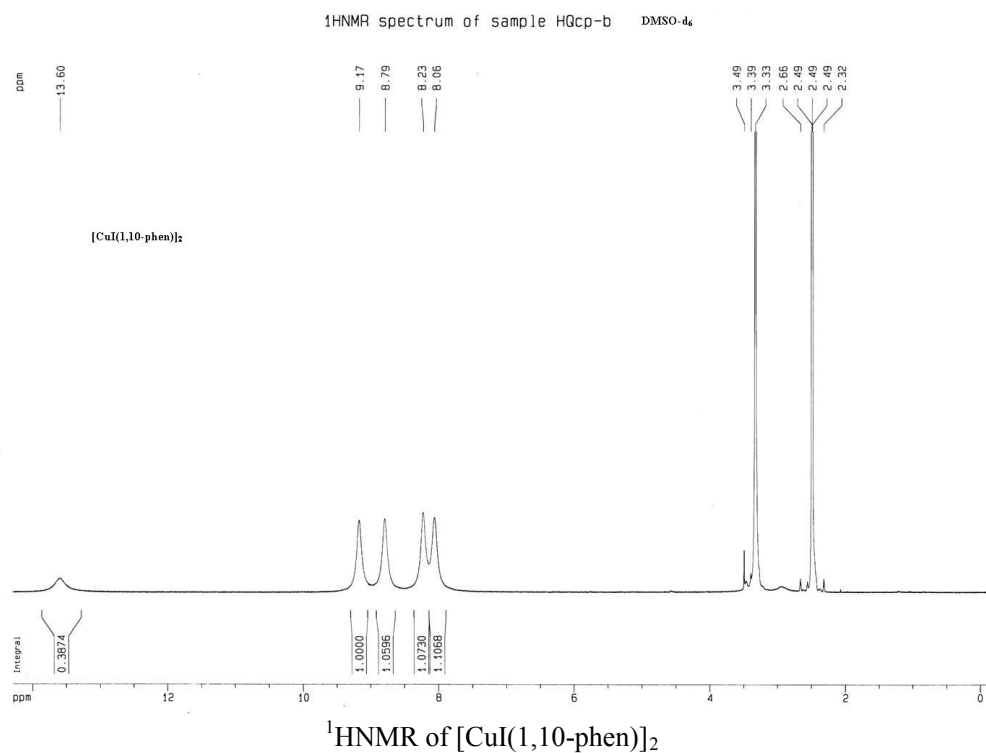

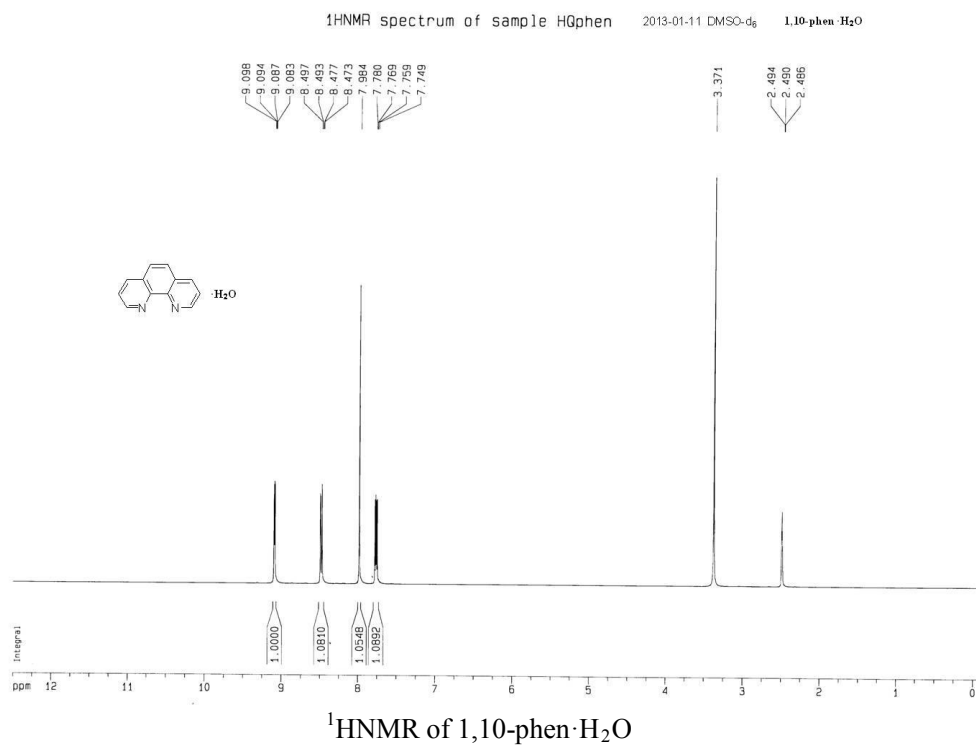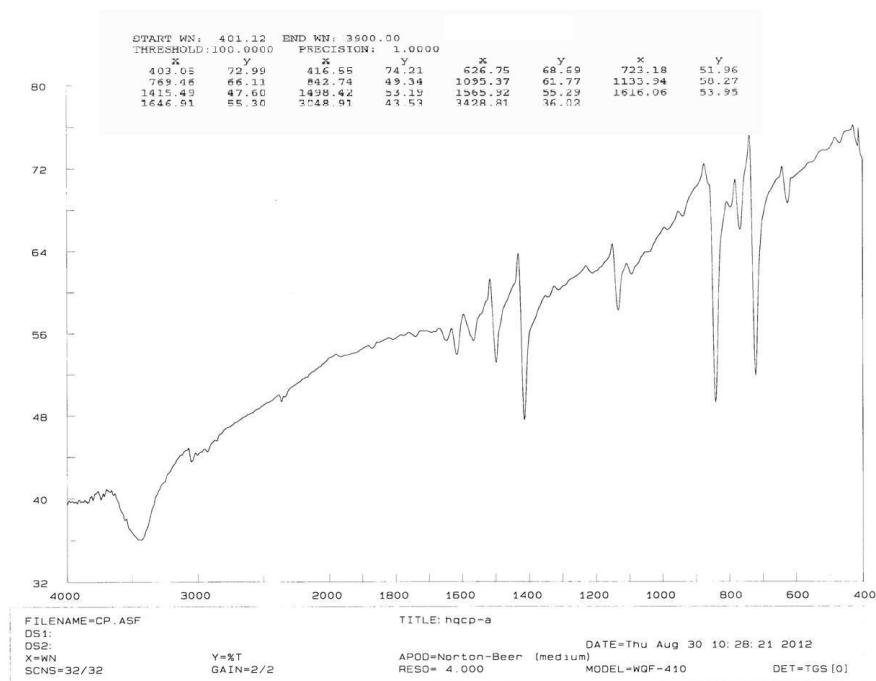

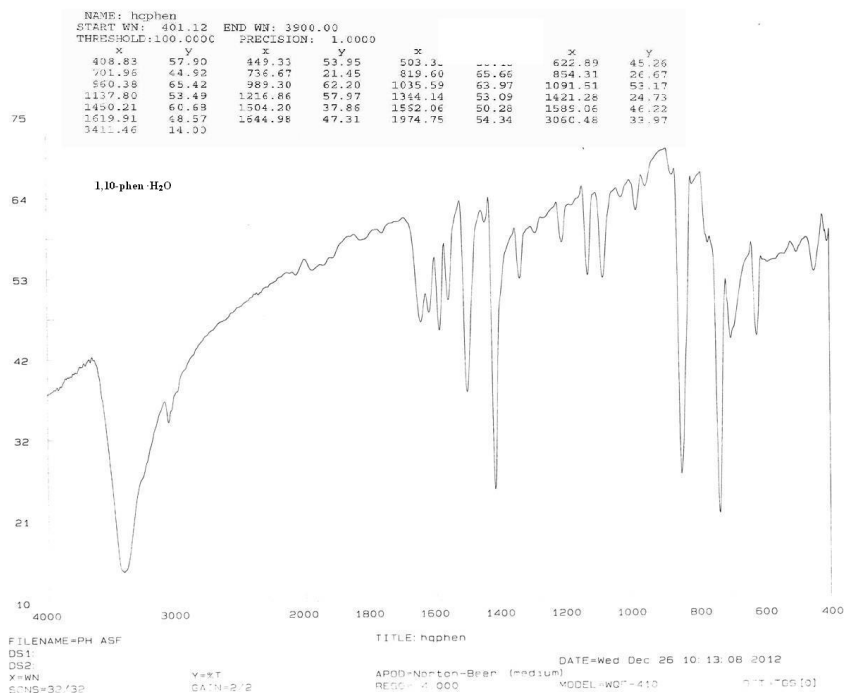

IR of 1,10-phen • H<sub>2</sub>O

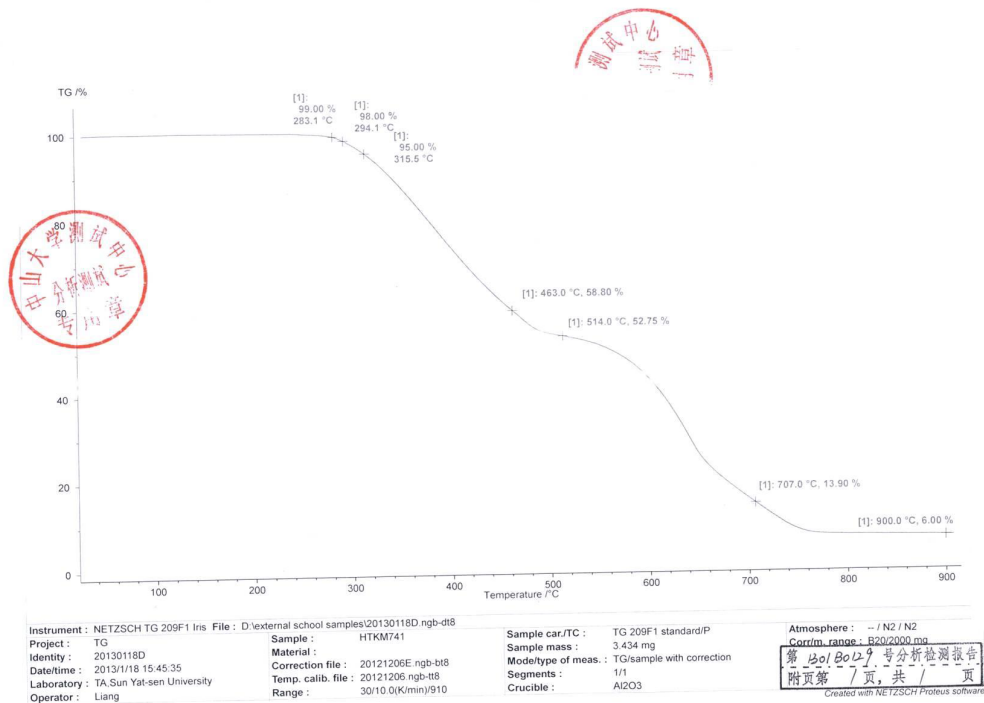

TG of [Cu(1,10-phen)]<sub>2</sub>

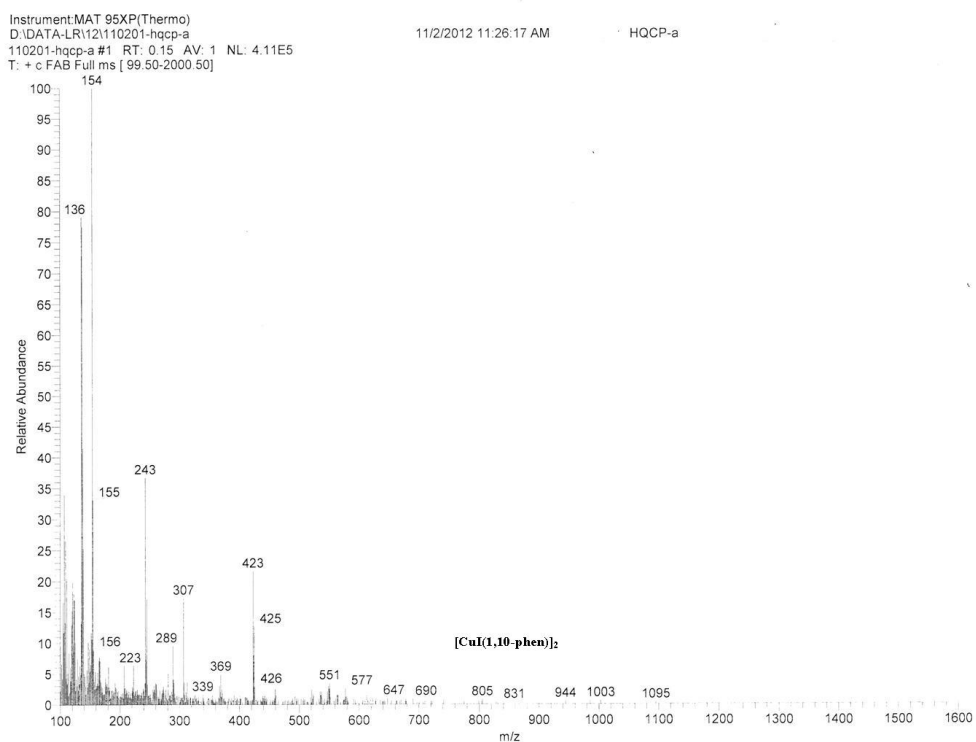

MS-FAB of  $[\text{CuI}(1,10\text{-phen})_2]$

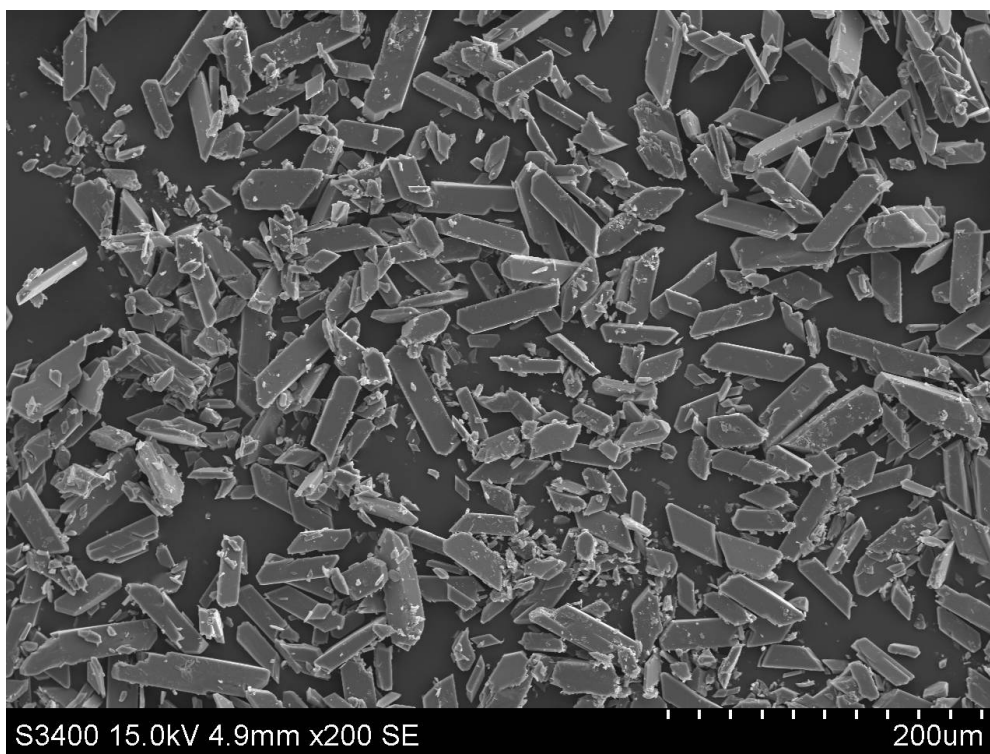

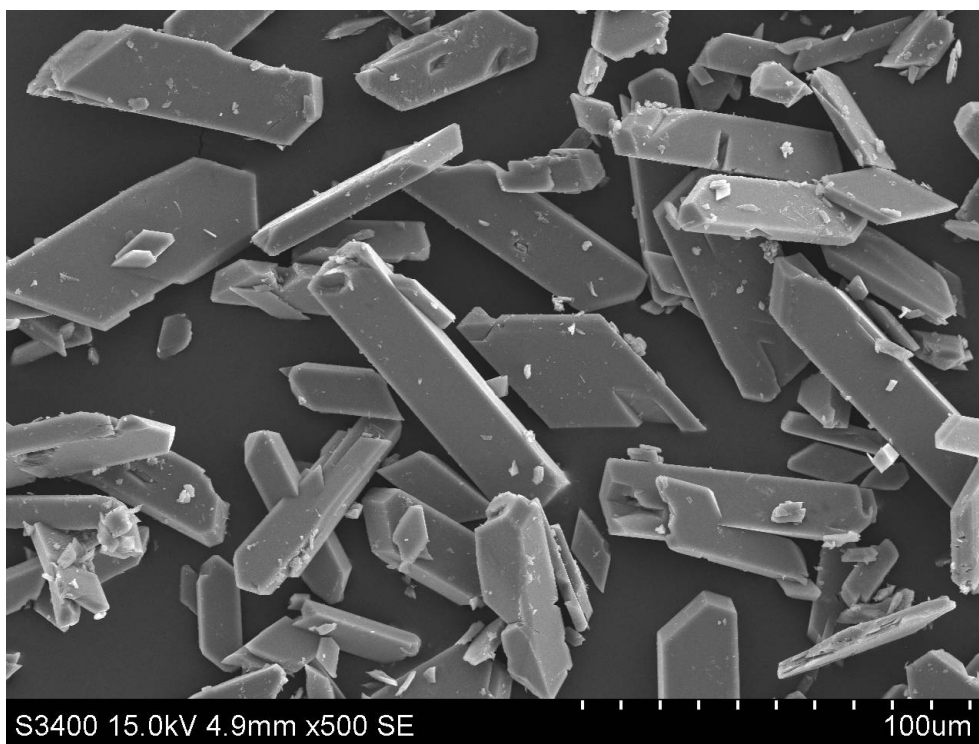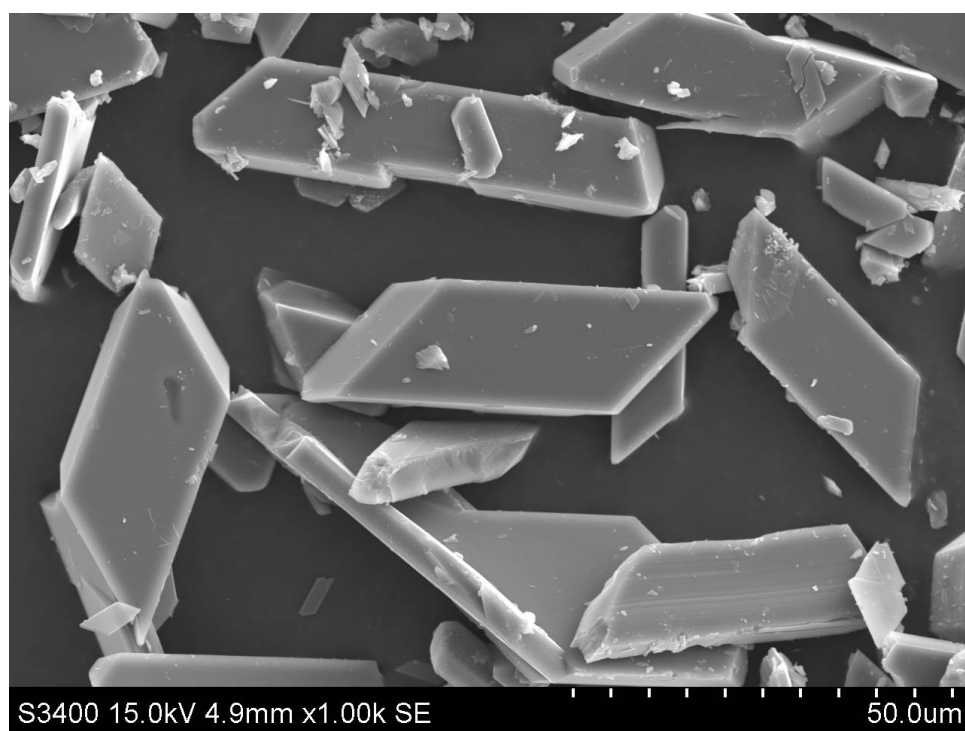

SEM of [CuI(1,10-phen)]<sub>2</sub>



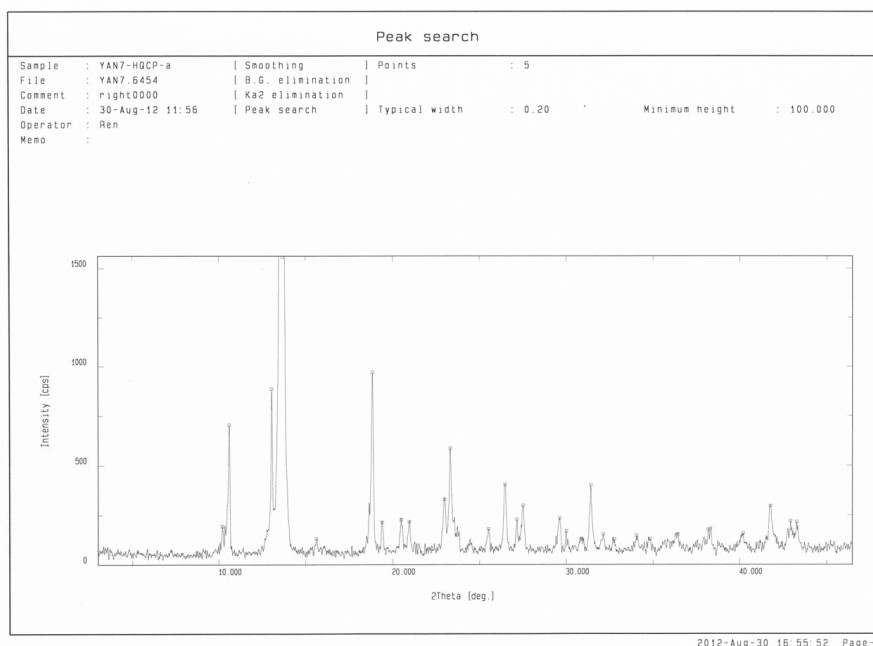

PXRD of  $[\text{Cu}(1, 10\text{-phen})]_2$

#### 4. Spectra for products (1a, 1r and 2a-2s)

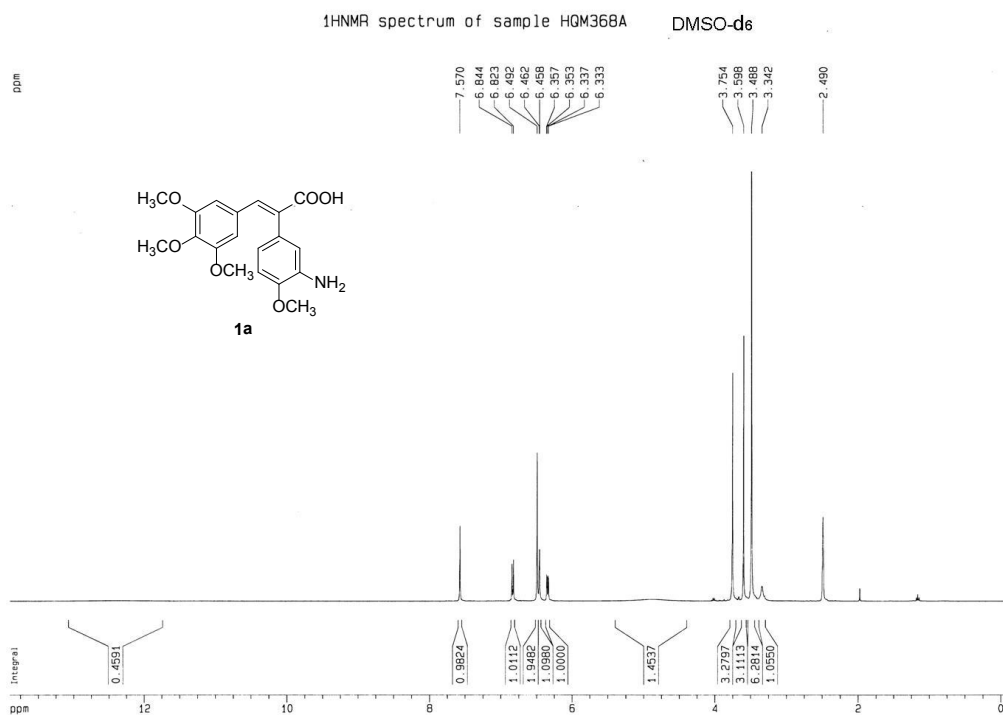



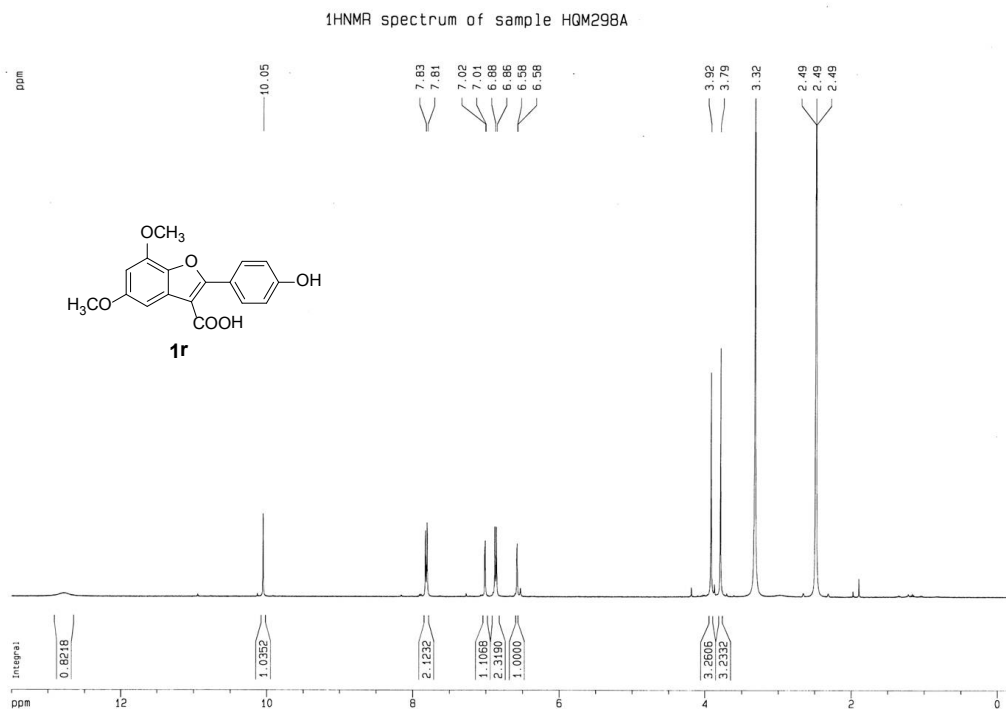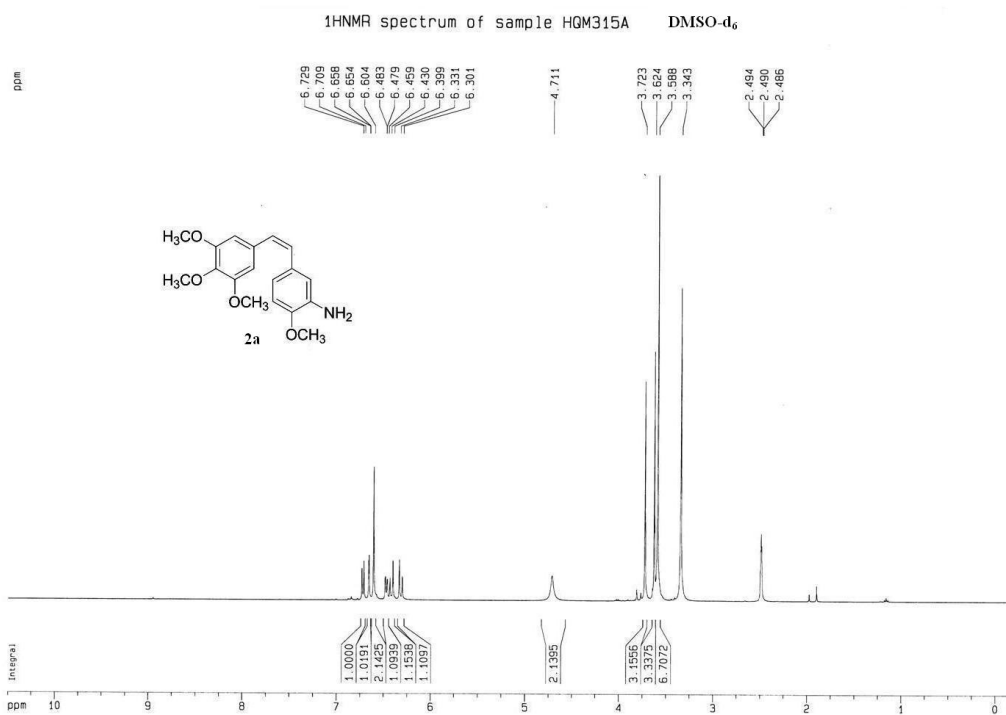

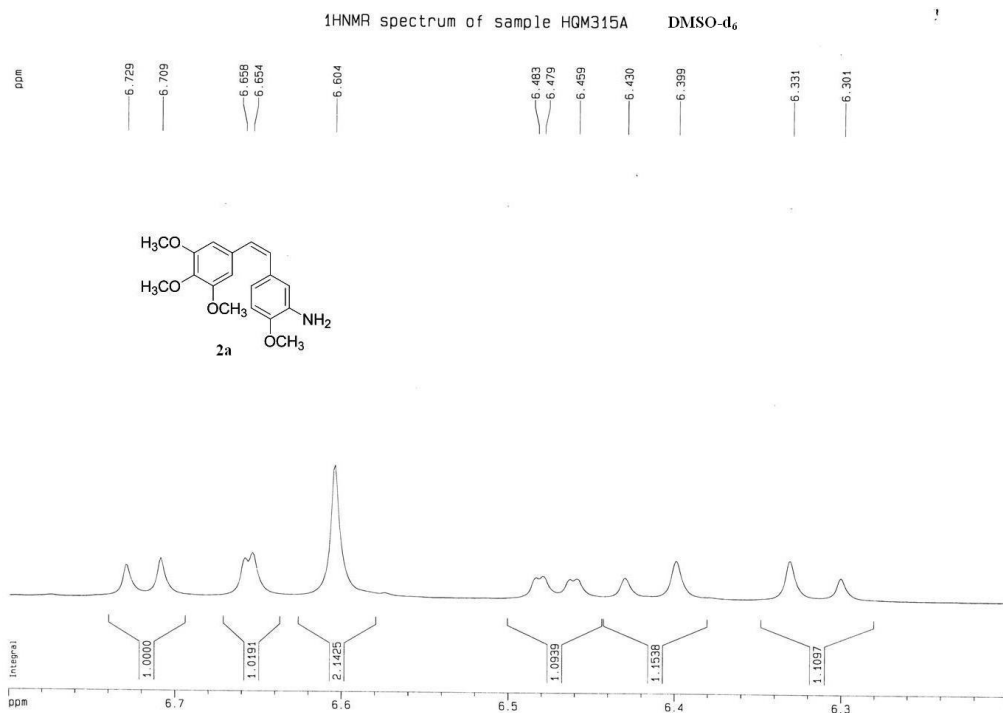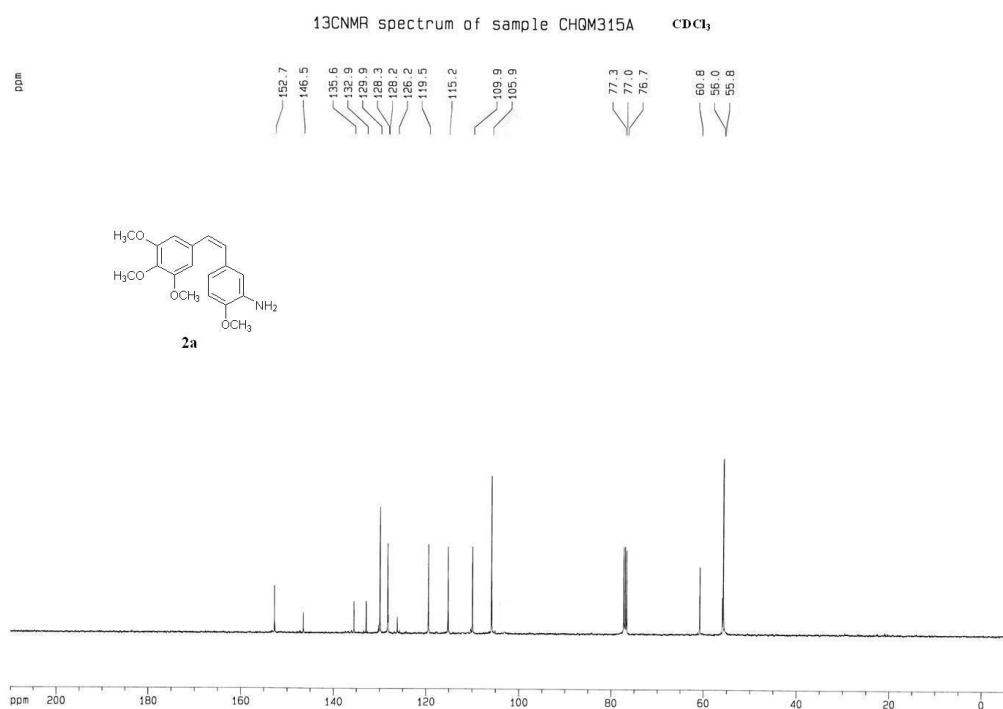

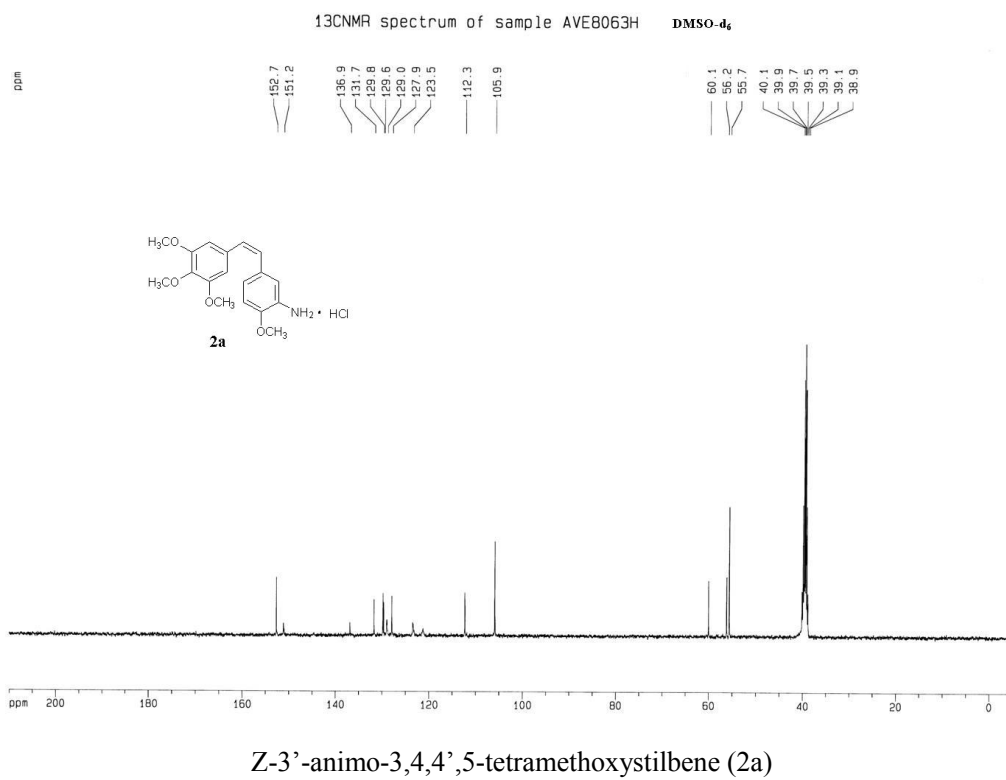

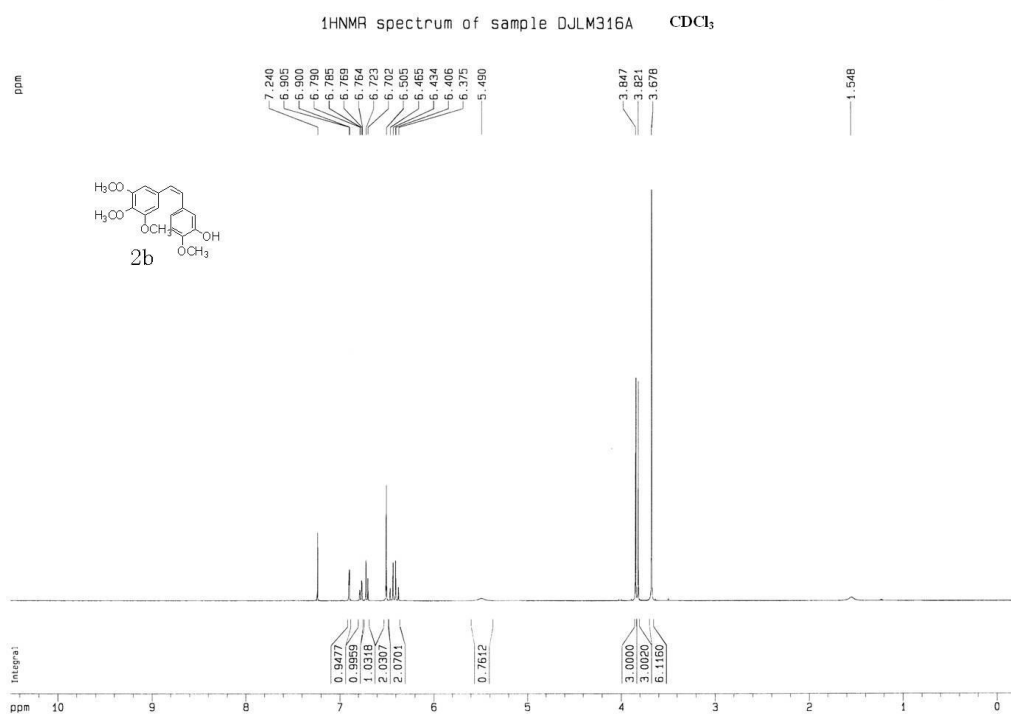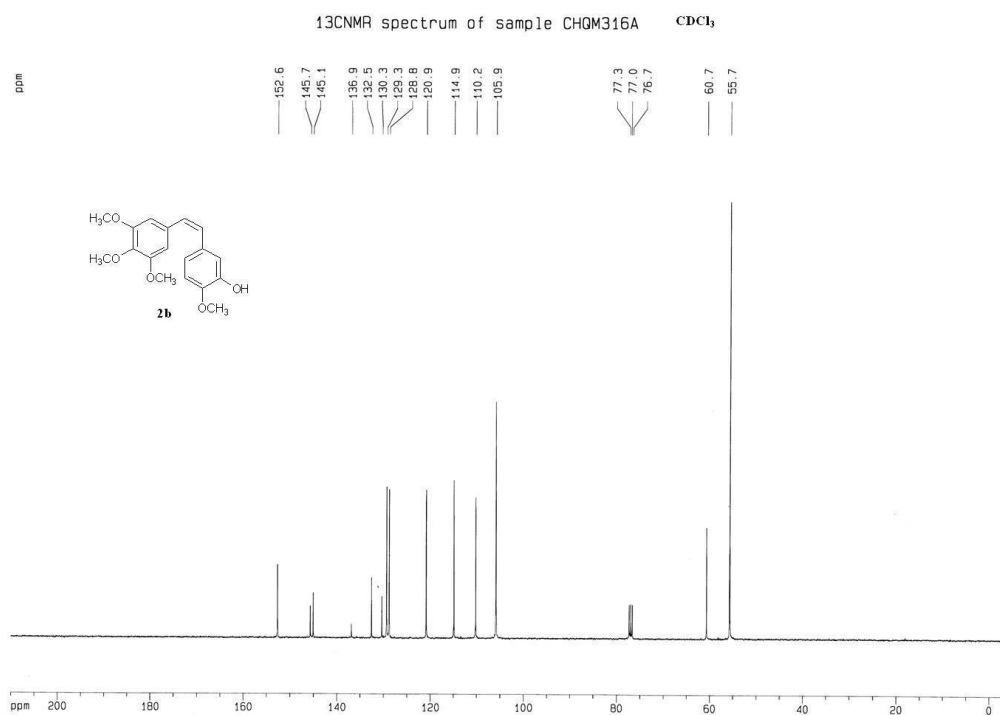

Z-3'-hydroxyl-3,4,4',5-tetramethoxystilbene(2b)

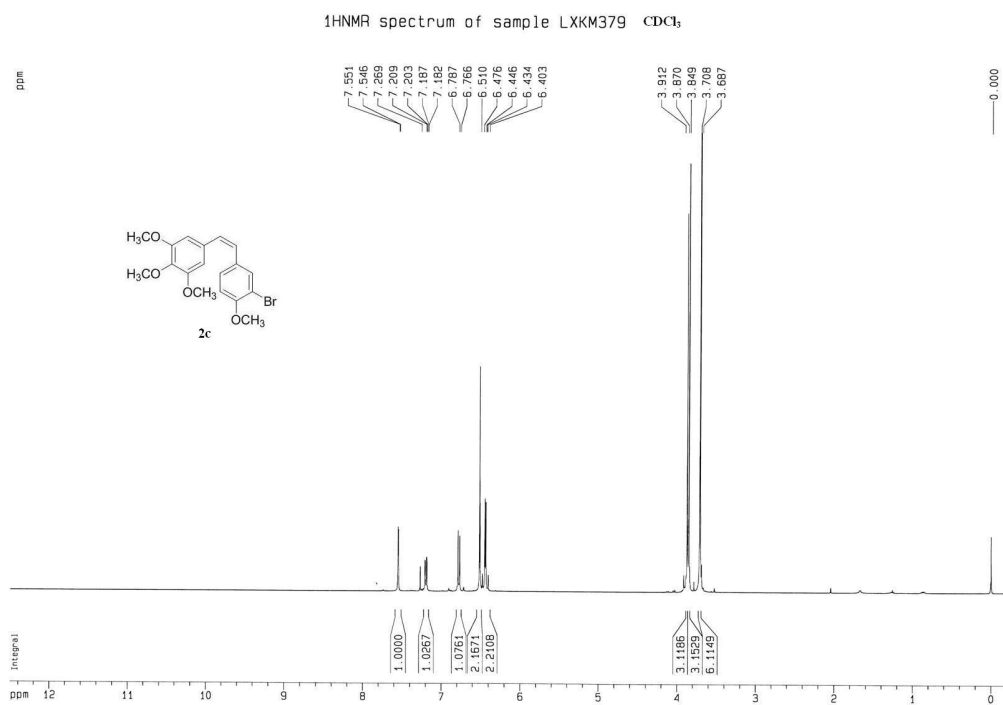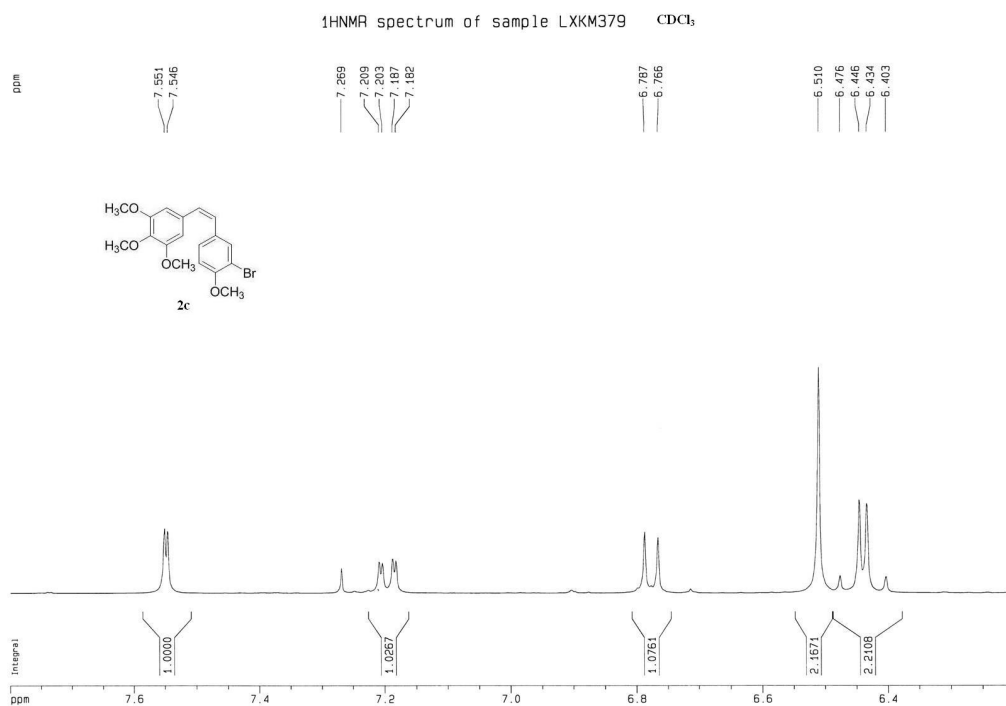

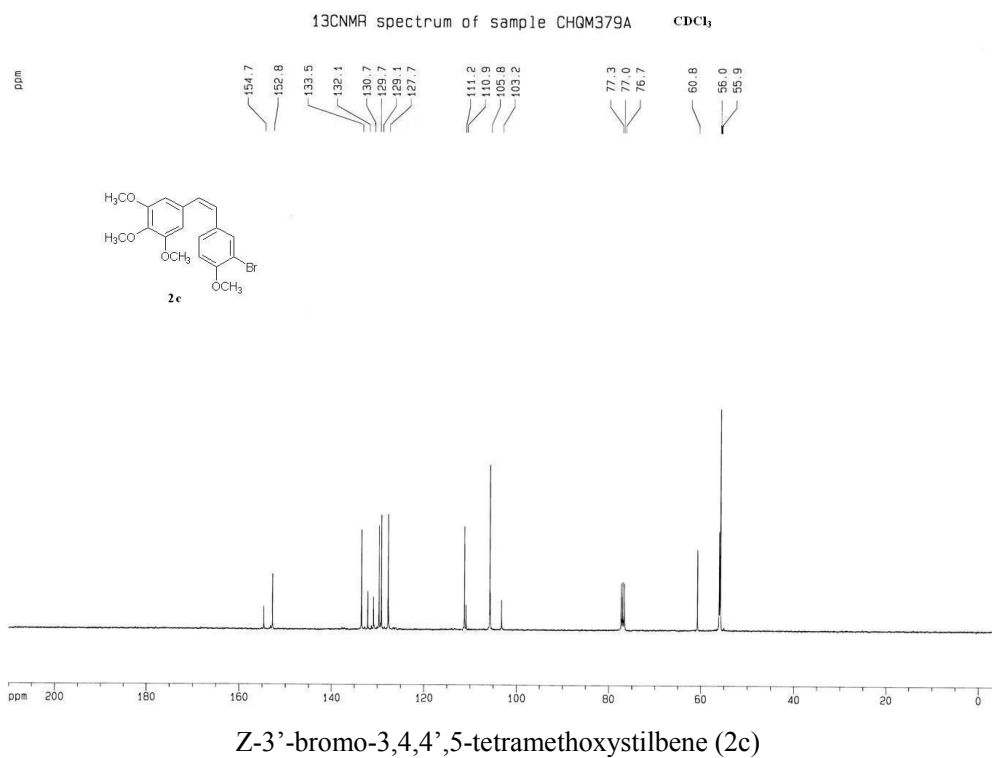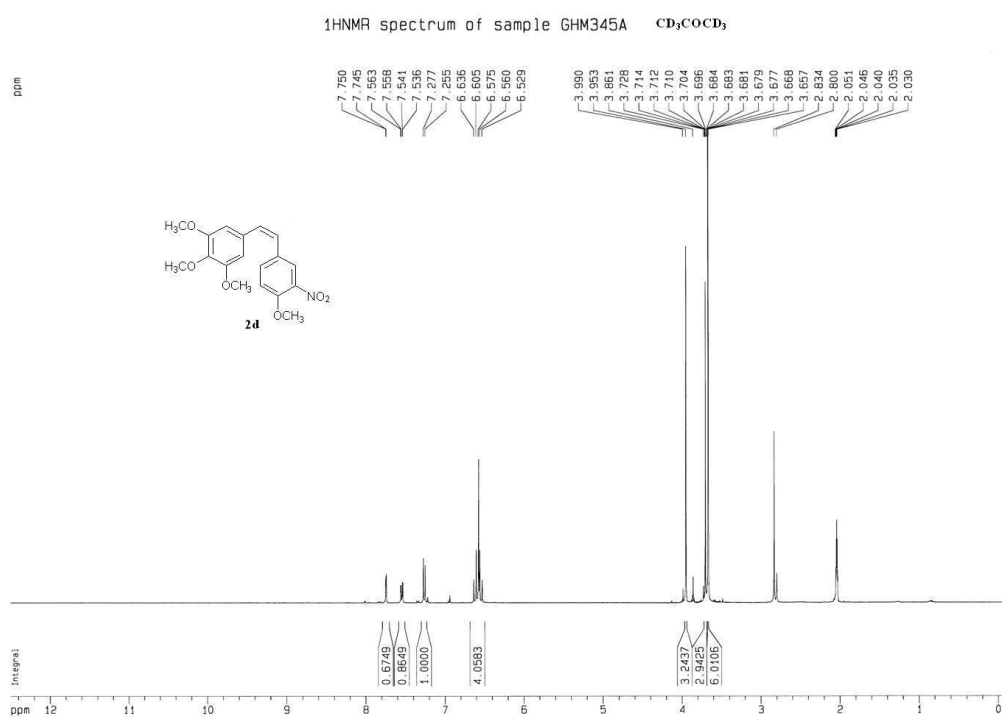

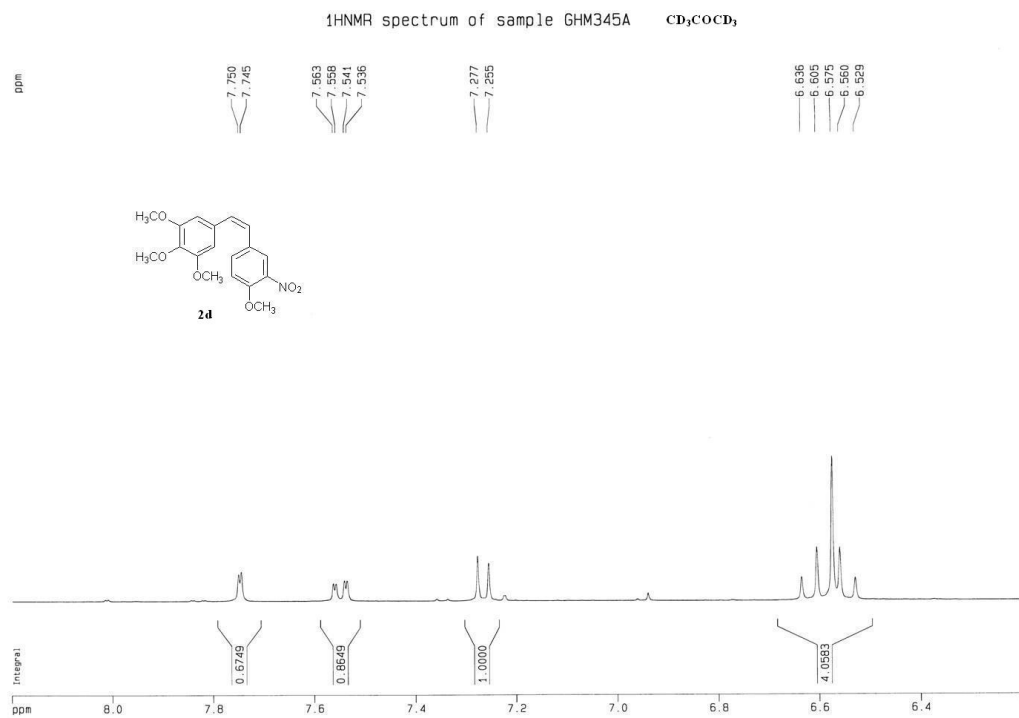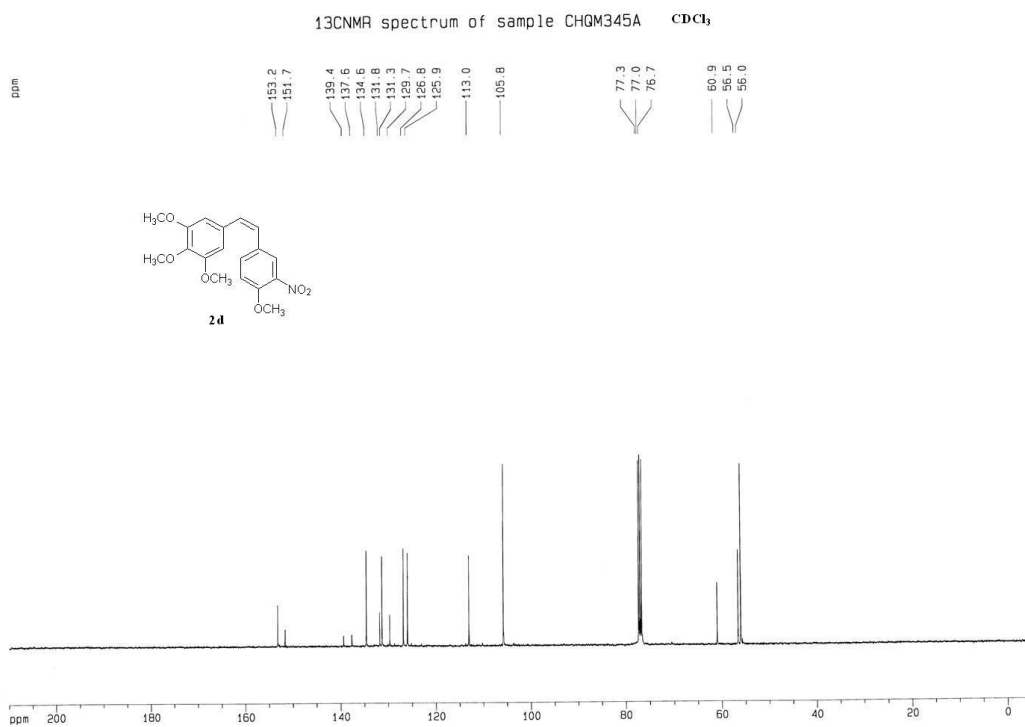

Z-3'-nitro-3,4,4',5-tetramethoxystilbene(2d)



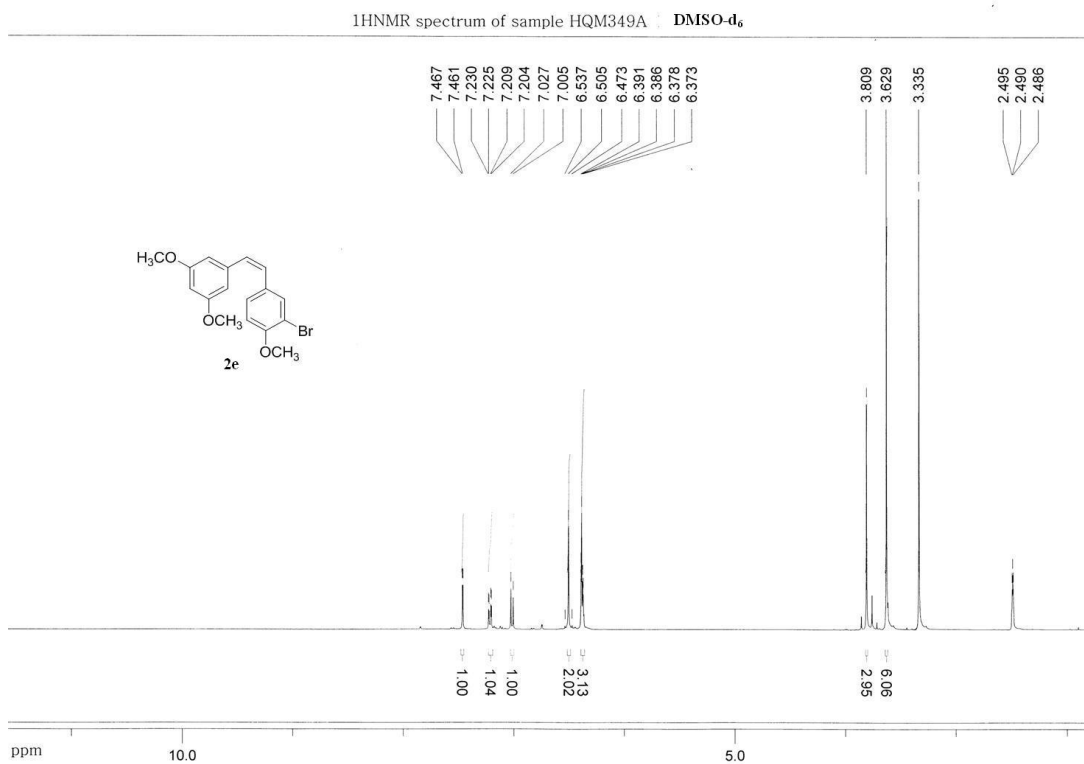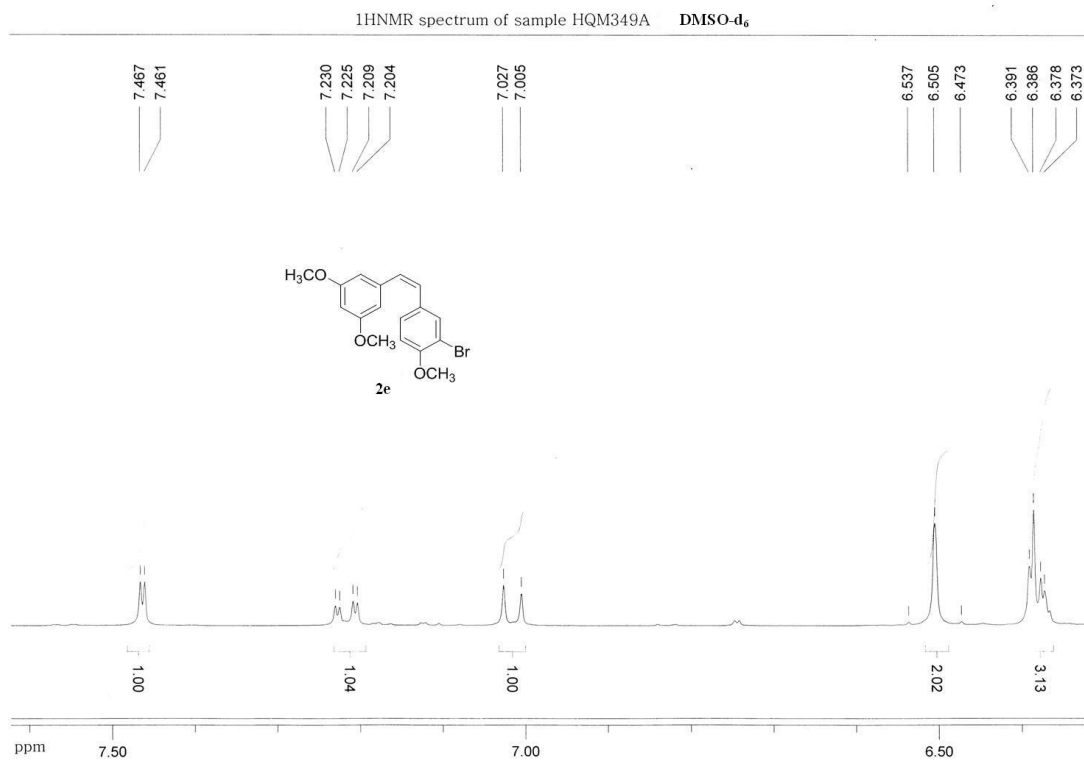

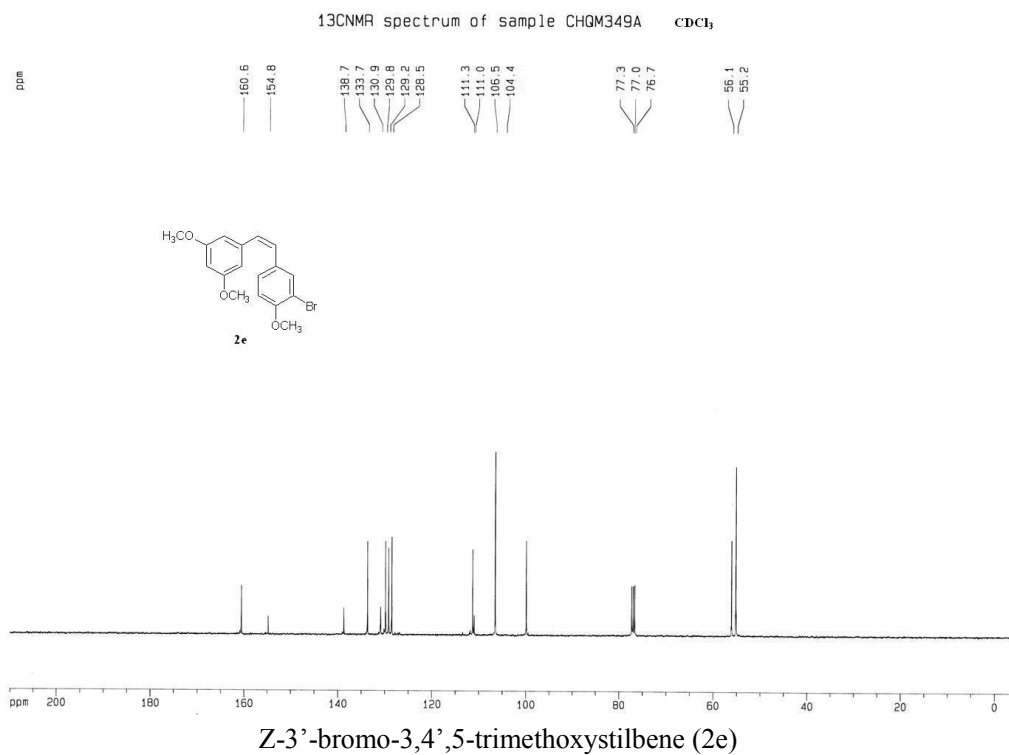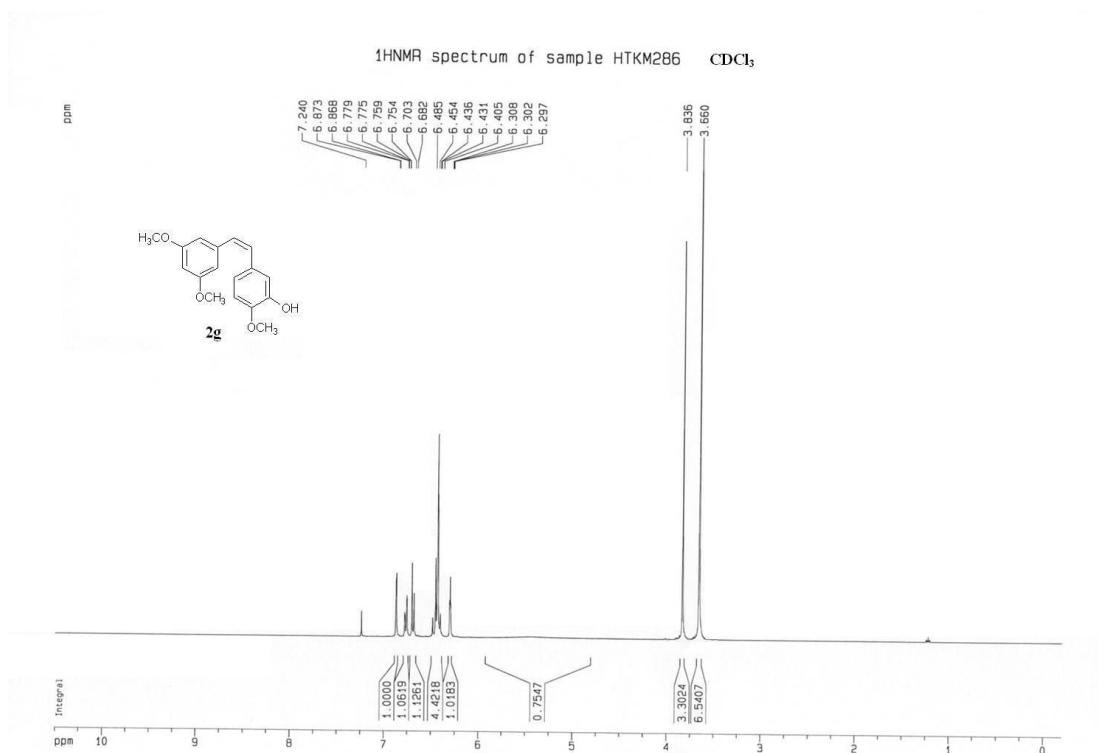

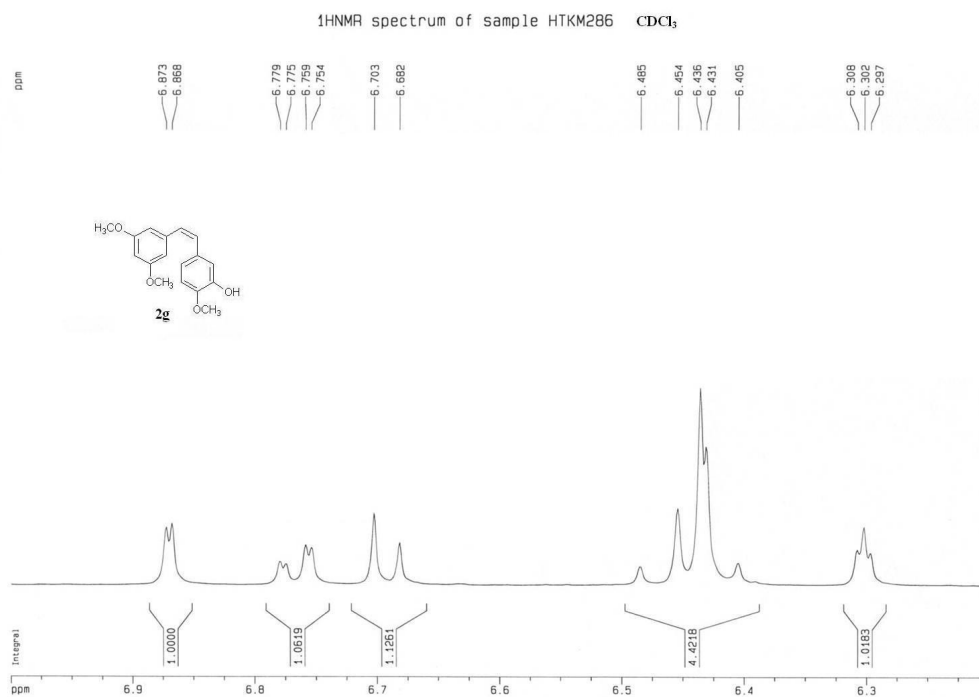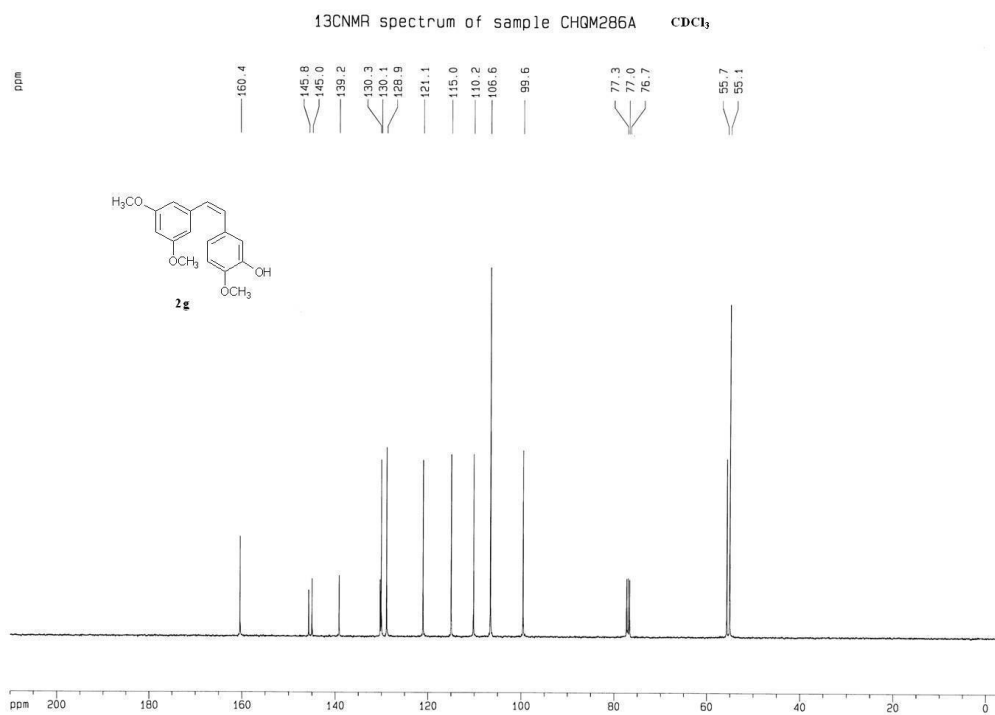

Z-3'-hydroxyl-3,4',5-trimethoxystilbene (2g)

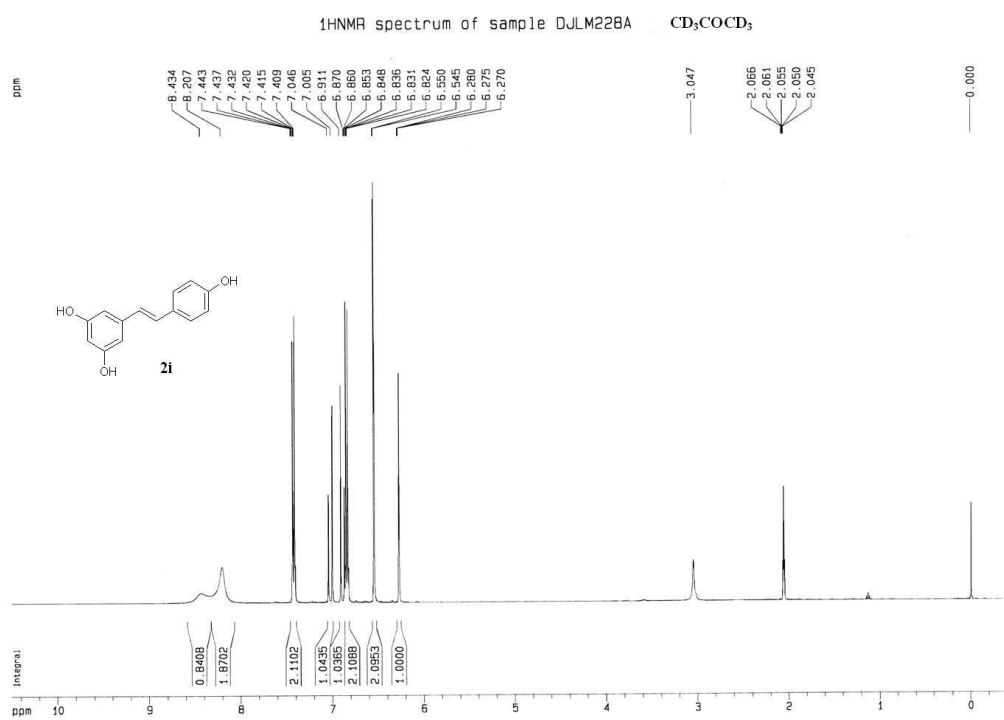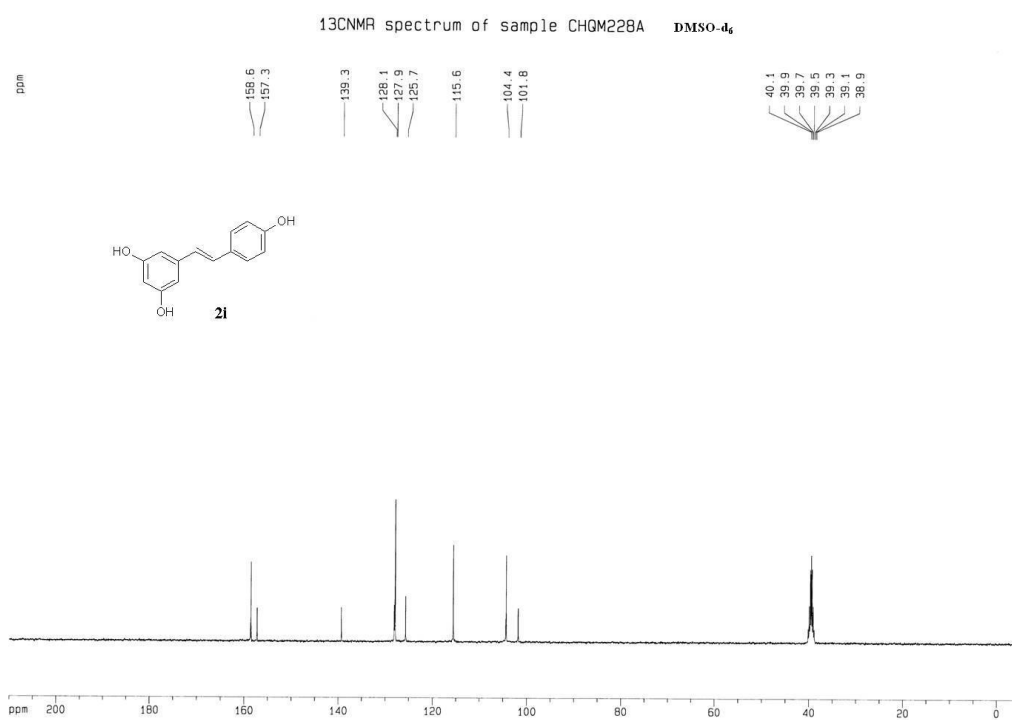

E-3,4',5-trihydroxystilbene (**2i**)

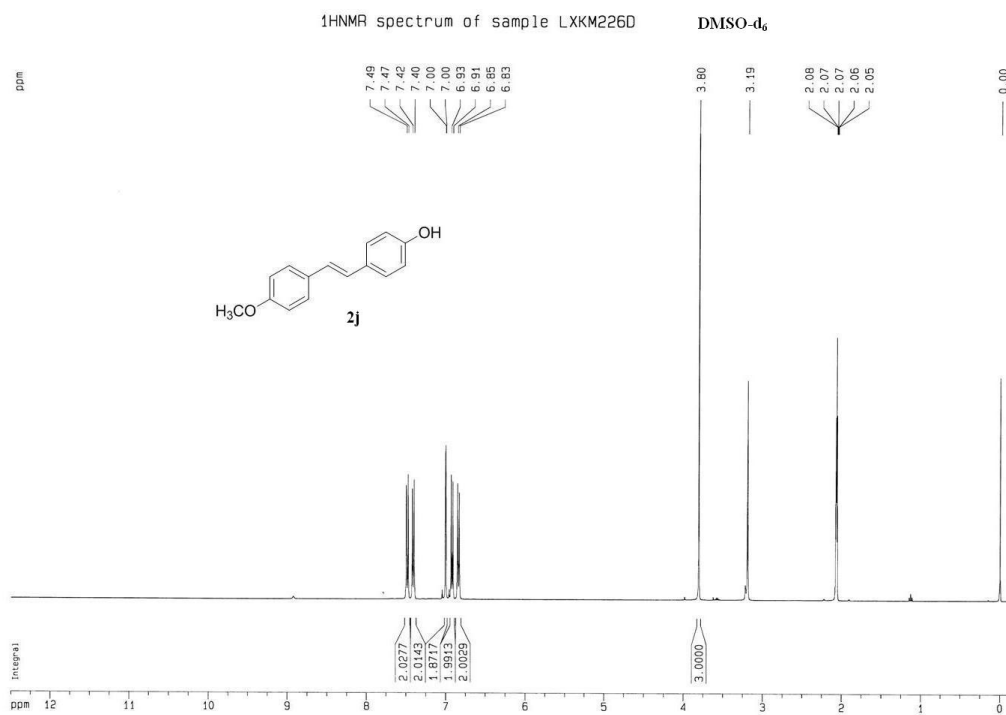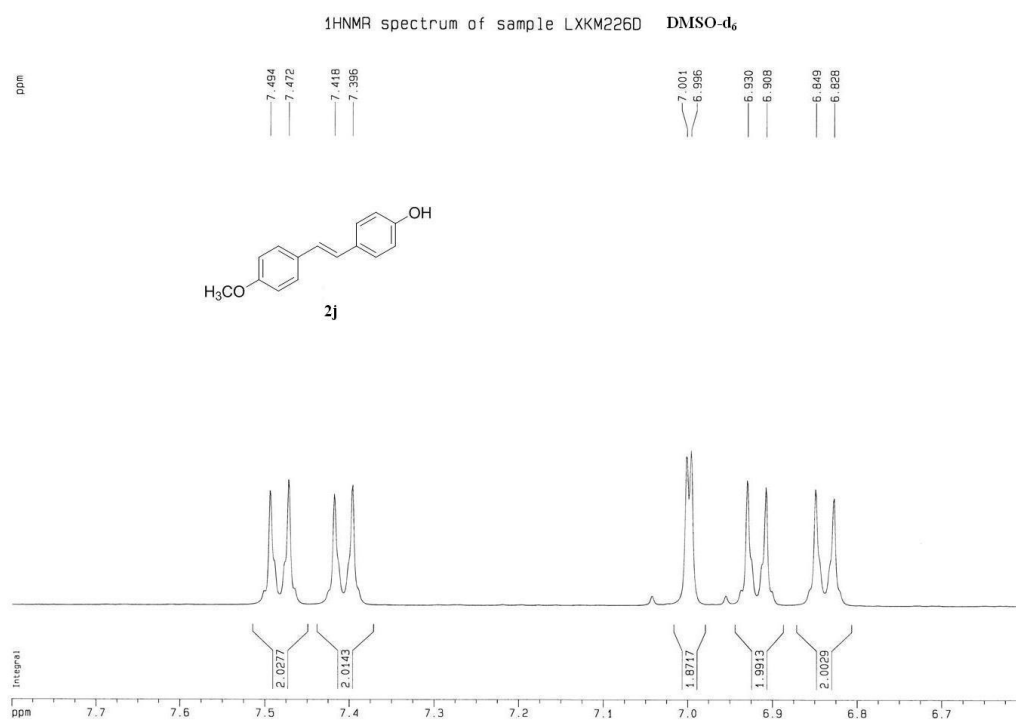

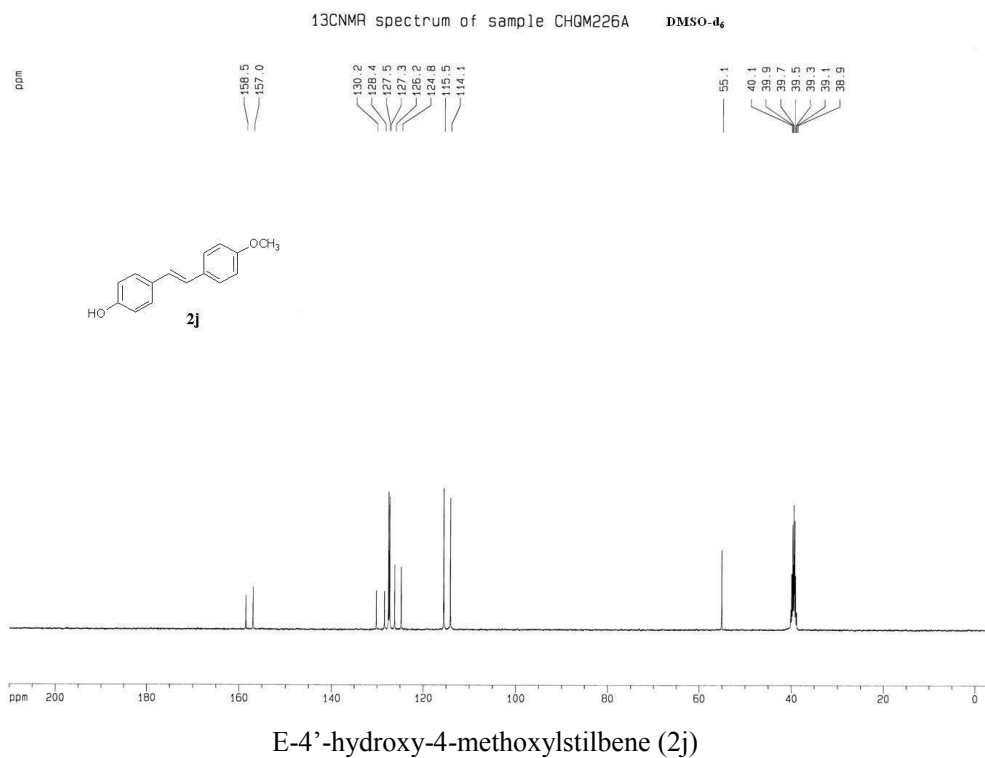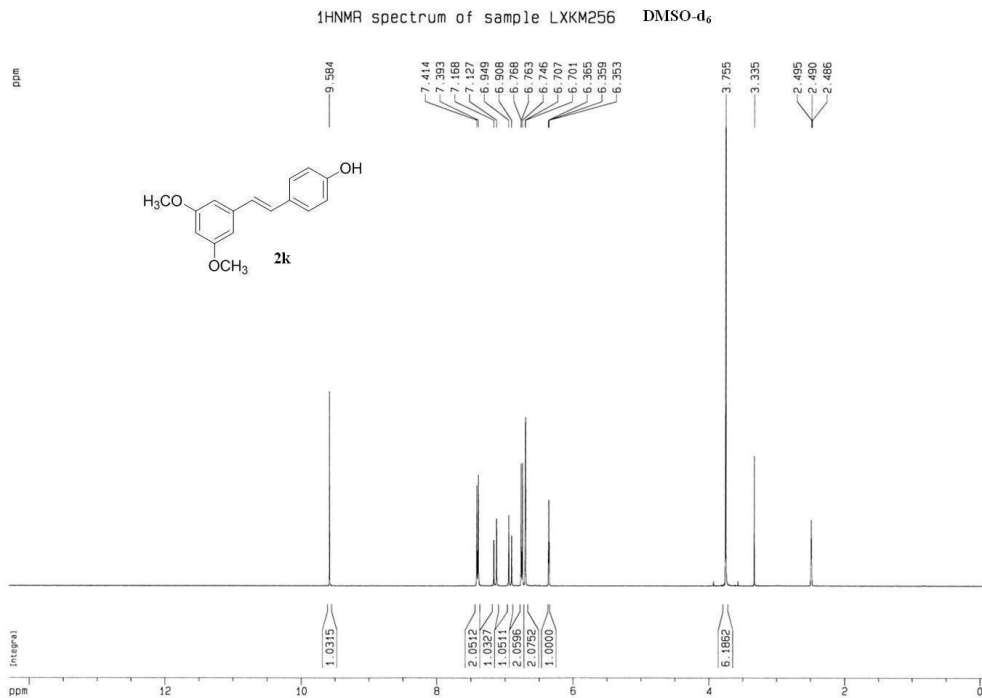

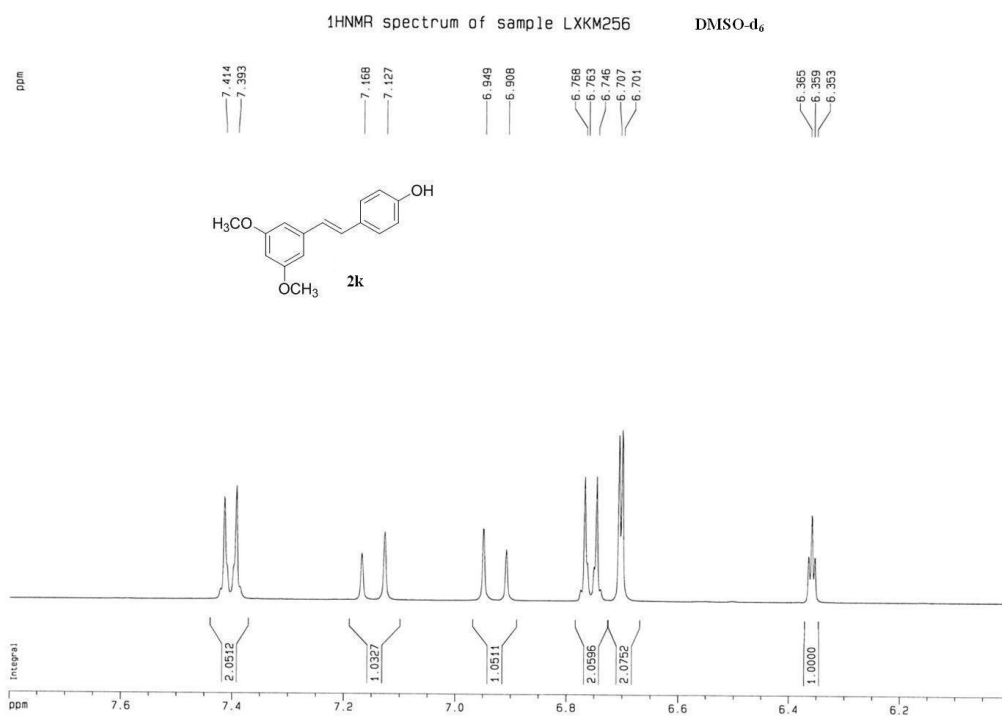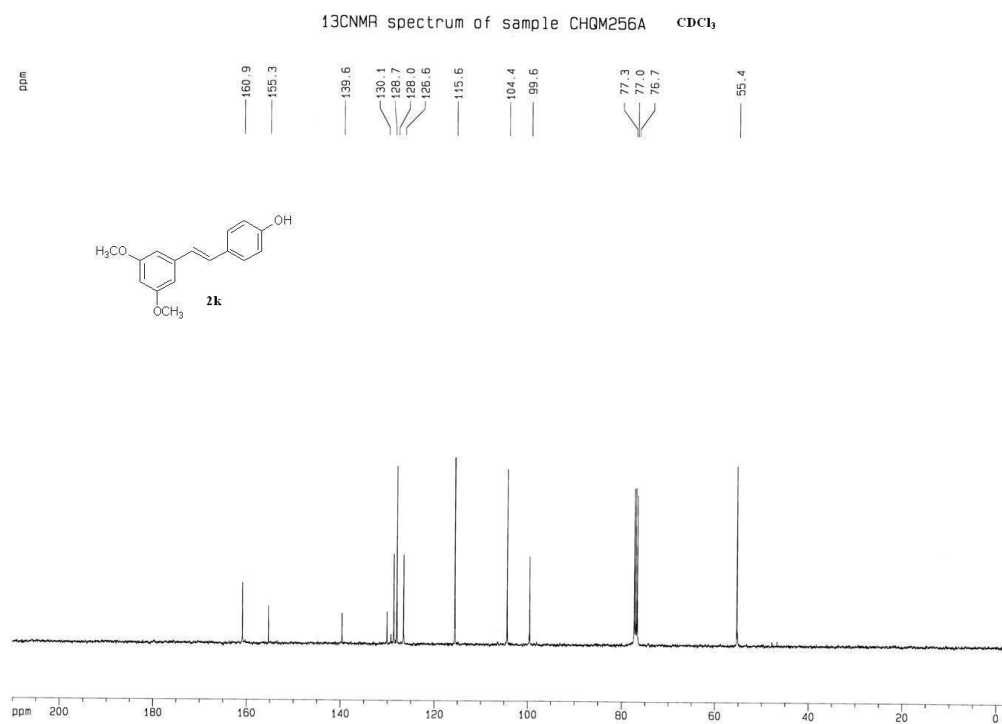

E-4'-hydroxy-3,5-dimethoxystilbene (2k)



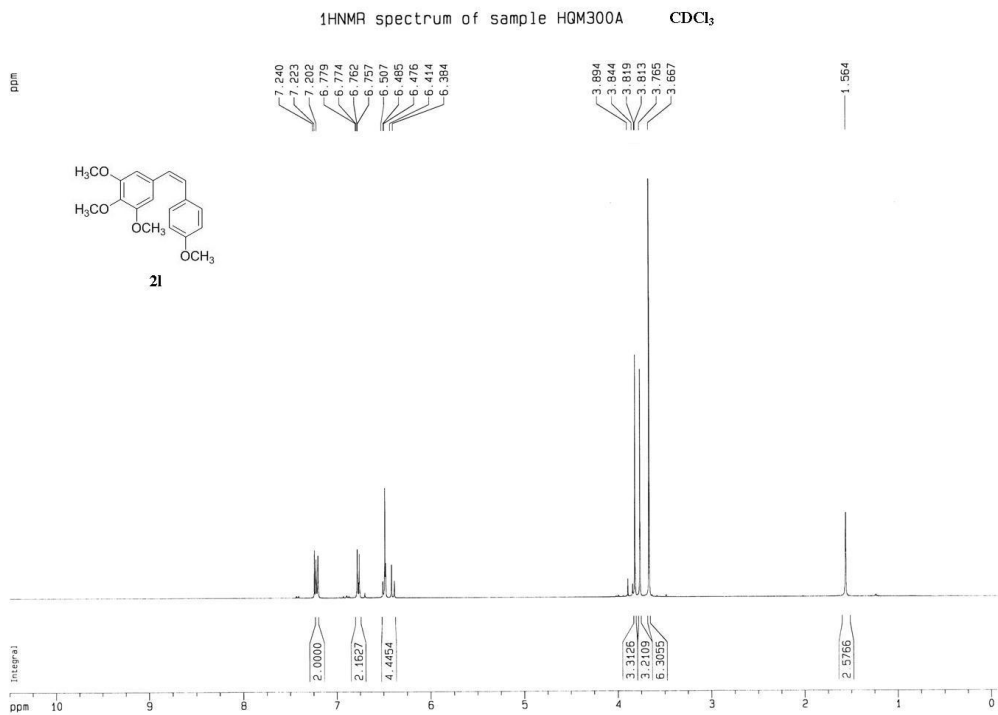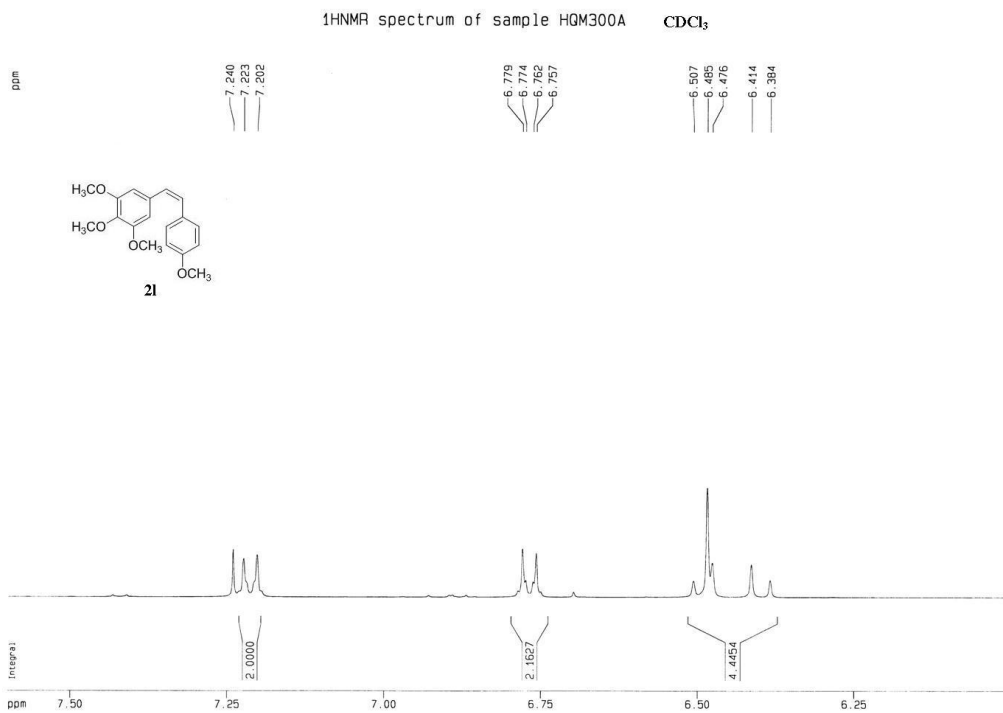

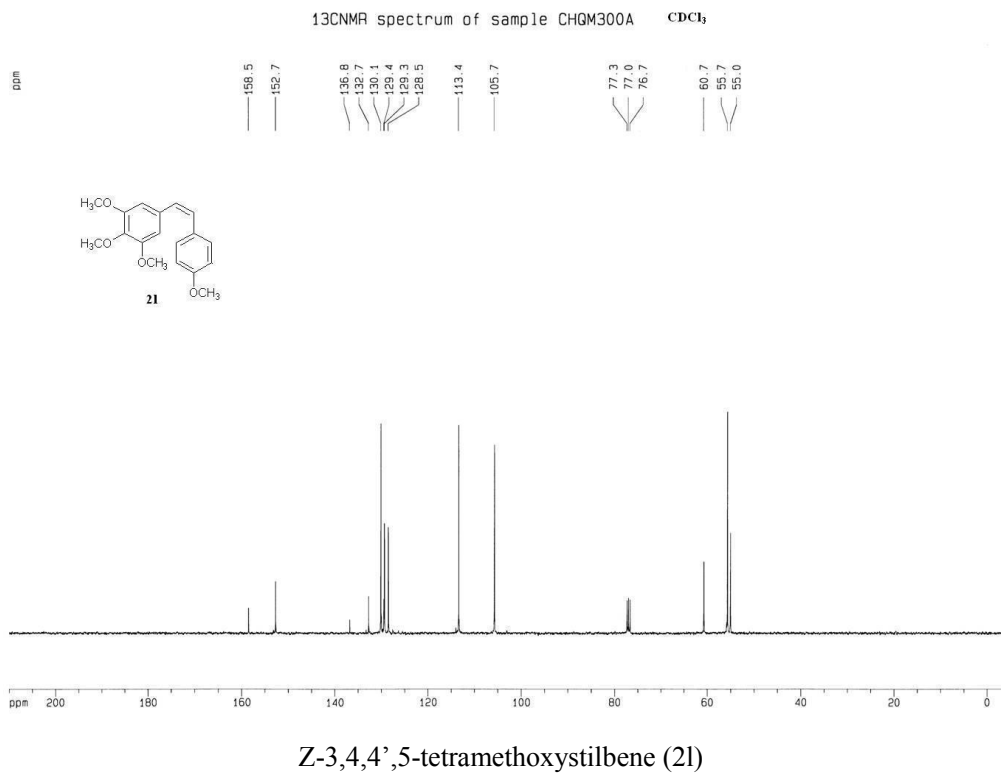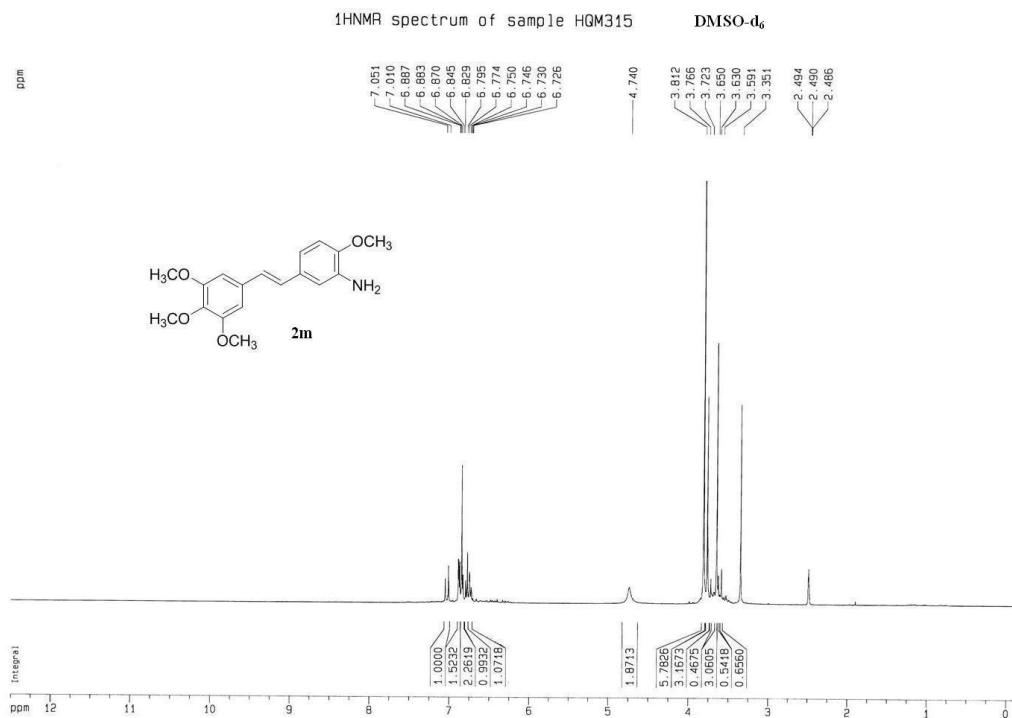

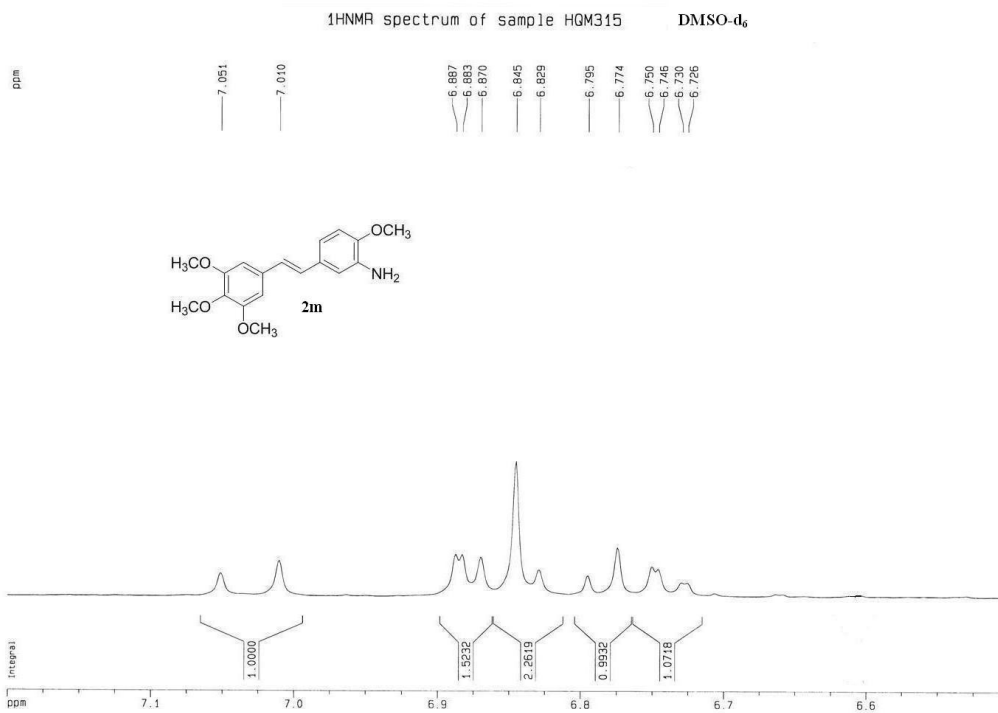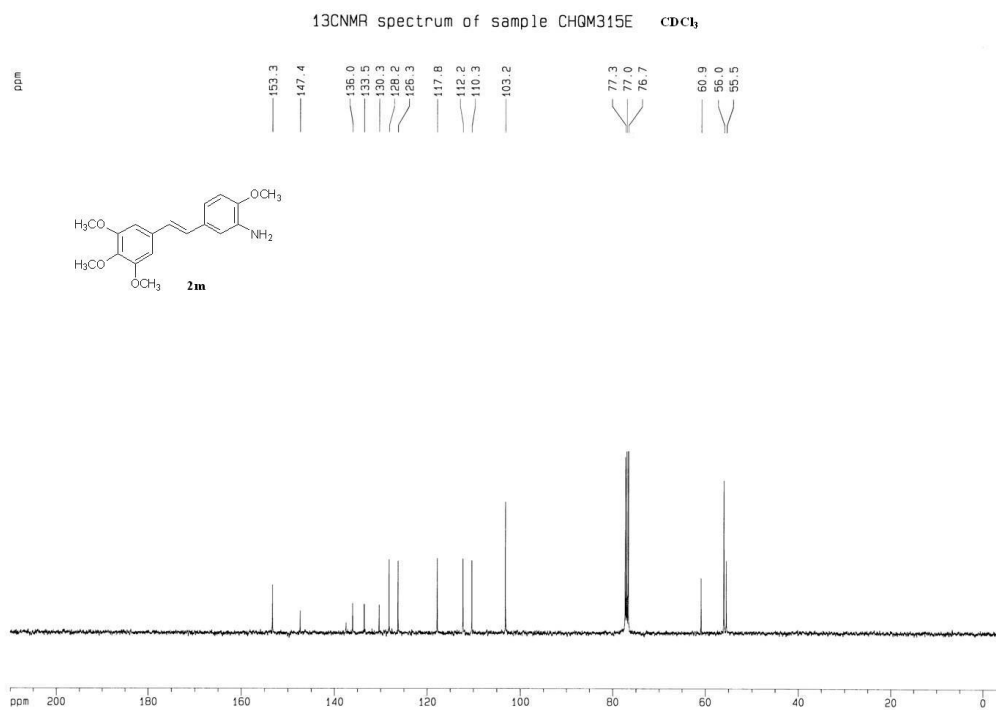

E-3'-animo-3,4,4',5-tetramethoxystilbene (2m)

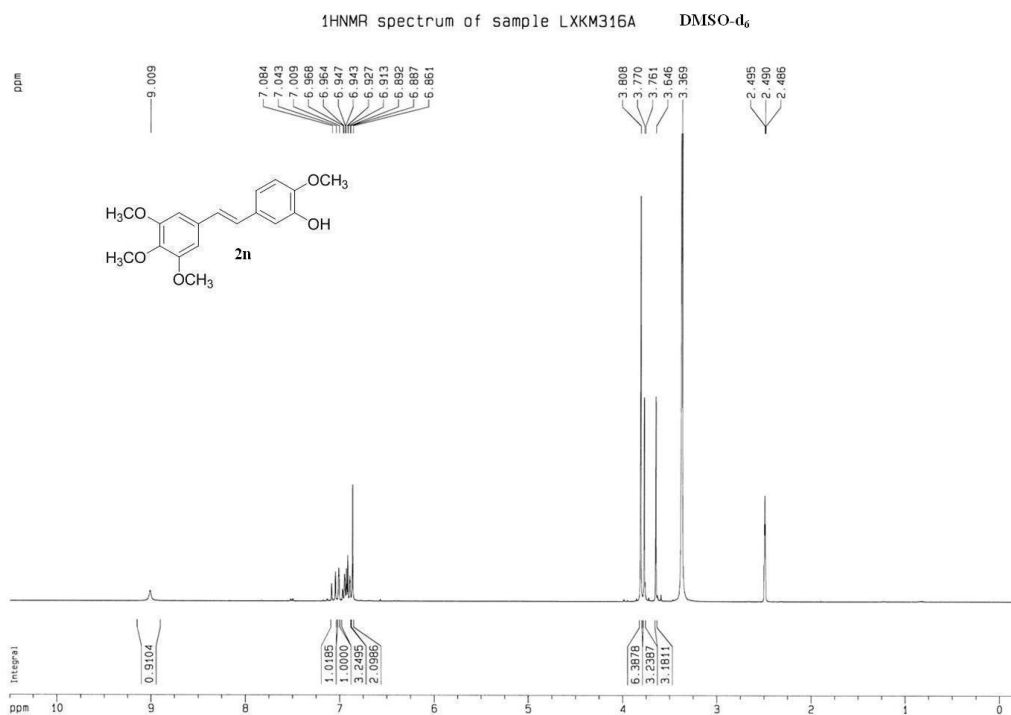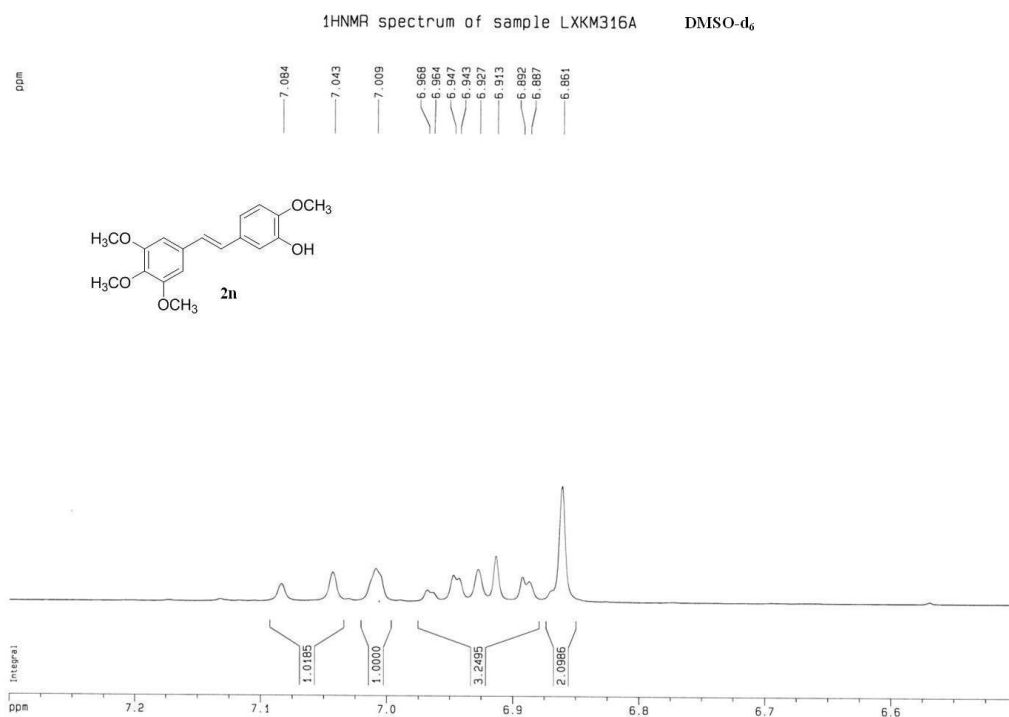

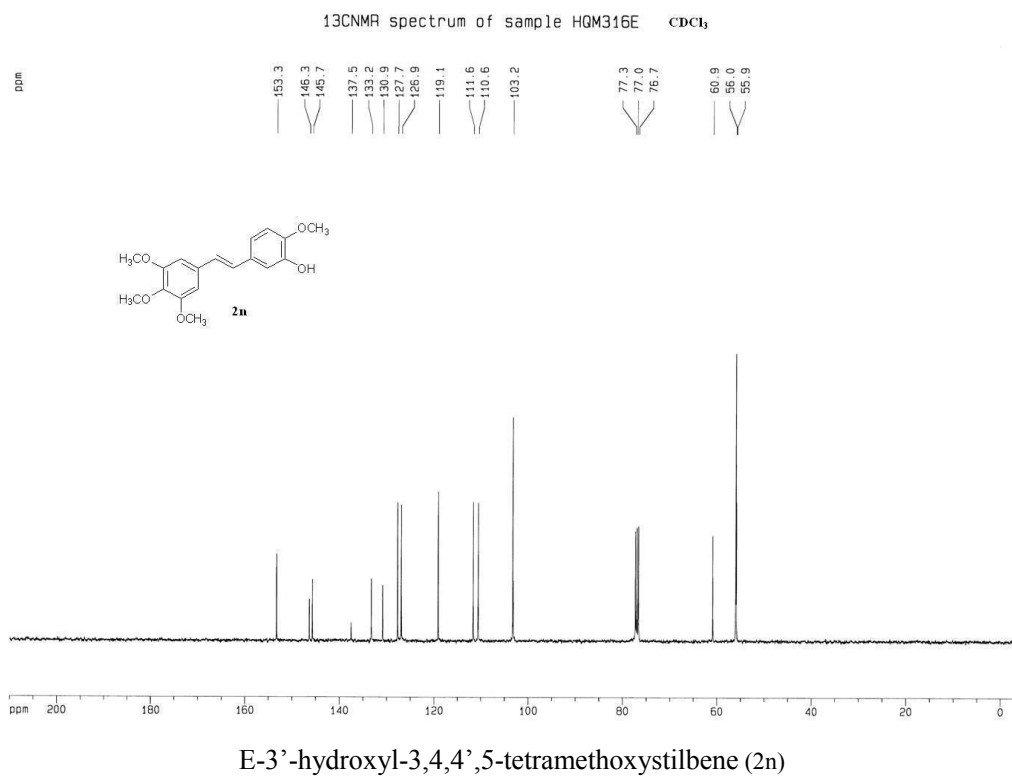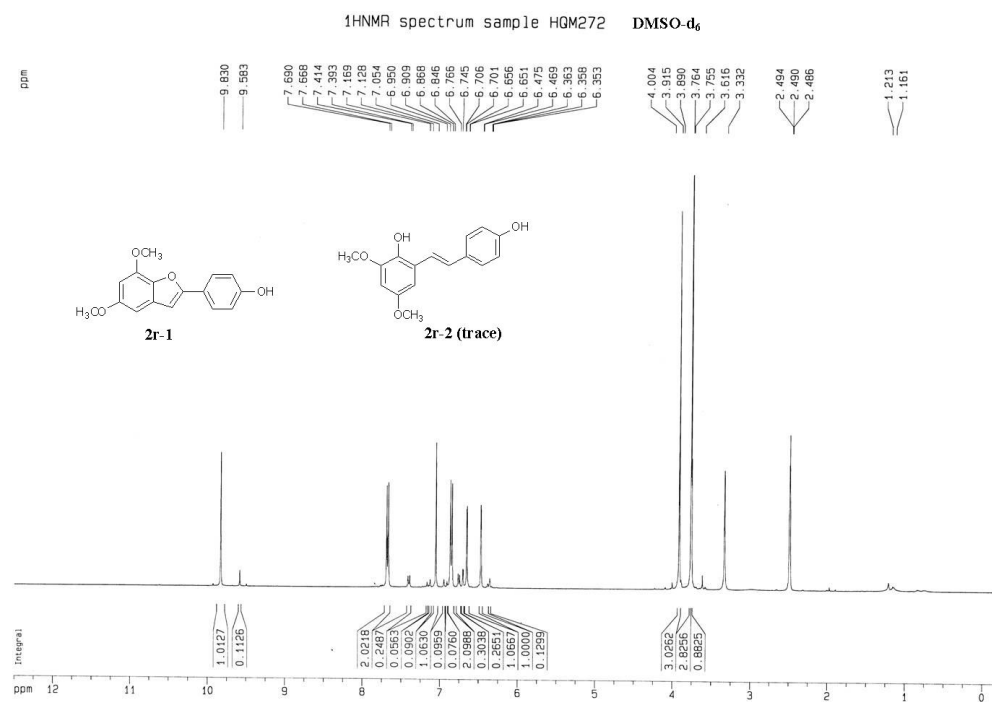

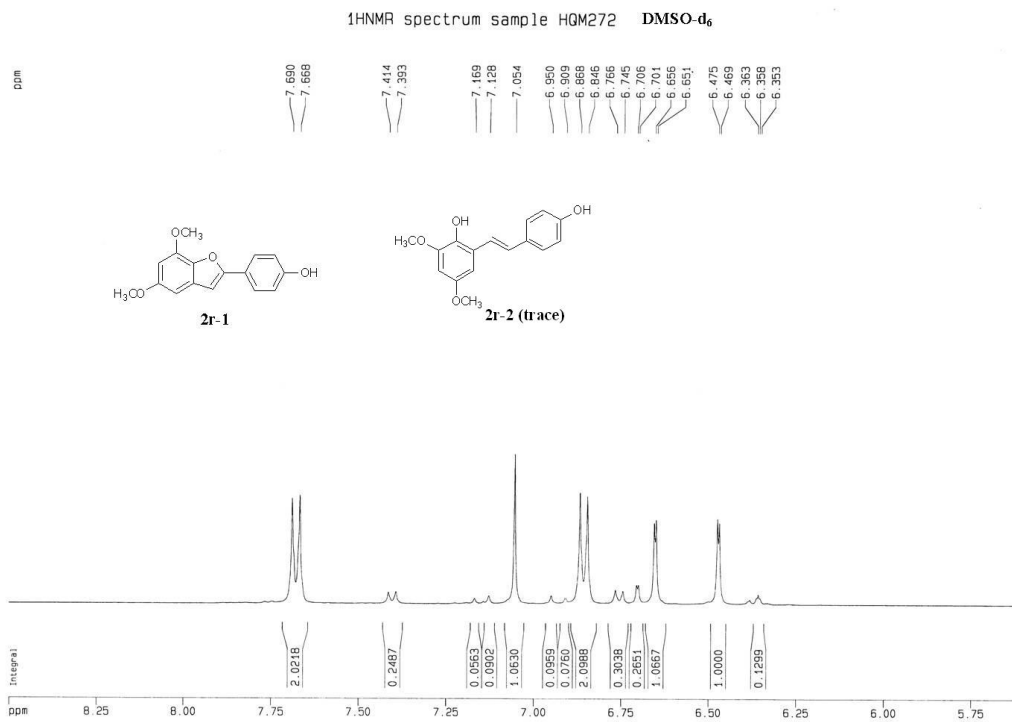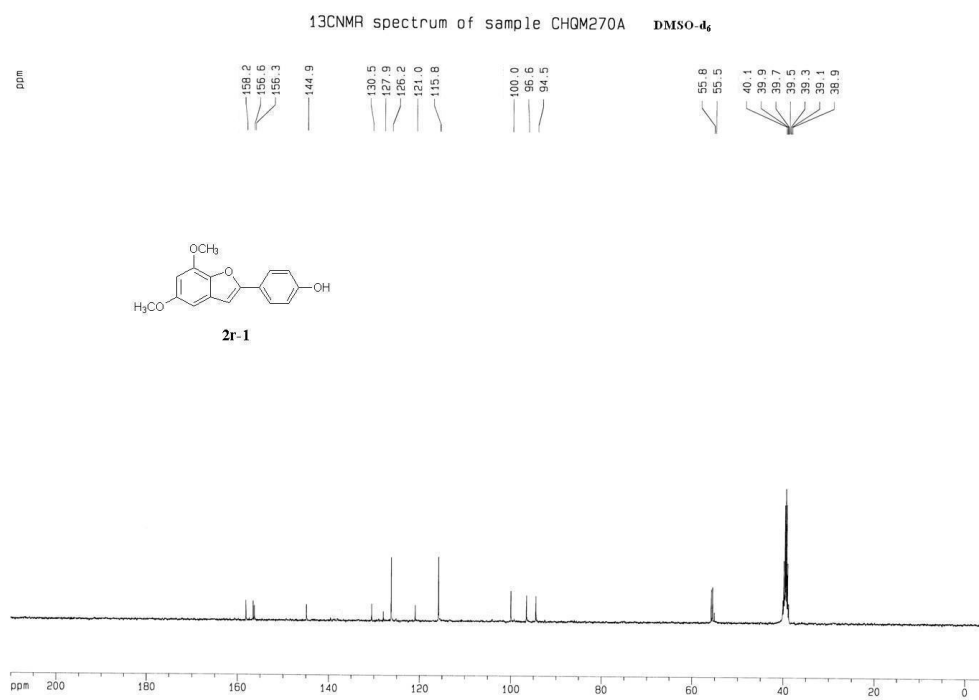

4-(5,7-dimethoxybenzofuran-2-yl)phenol (2r-1)

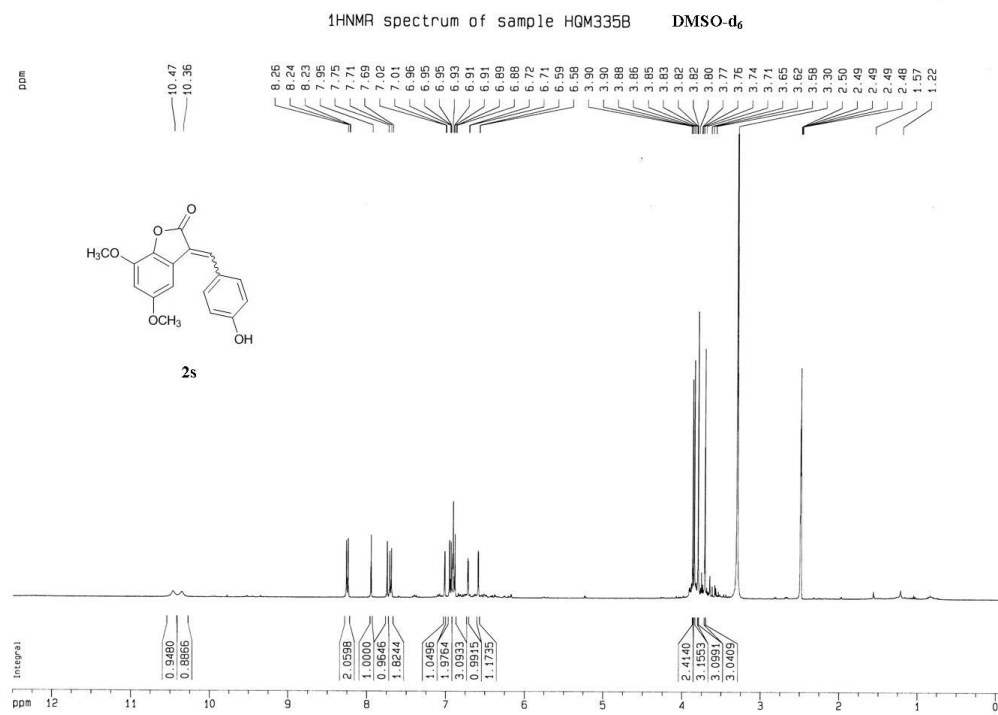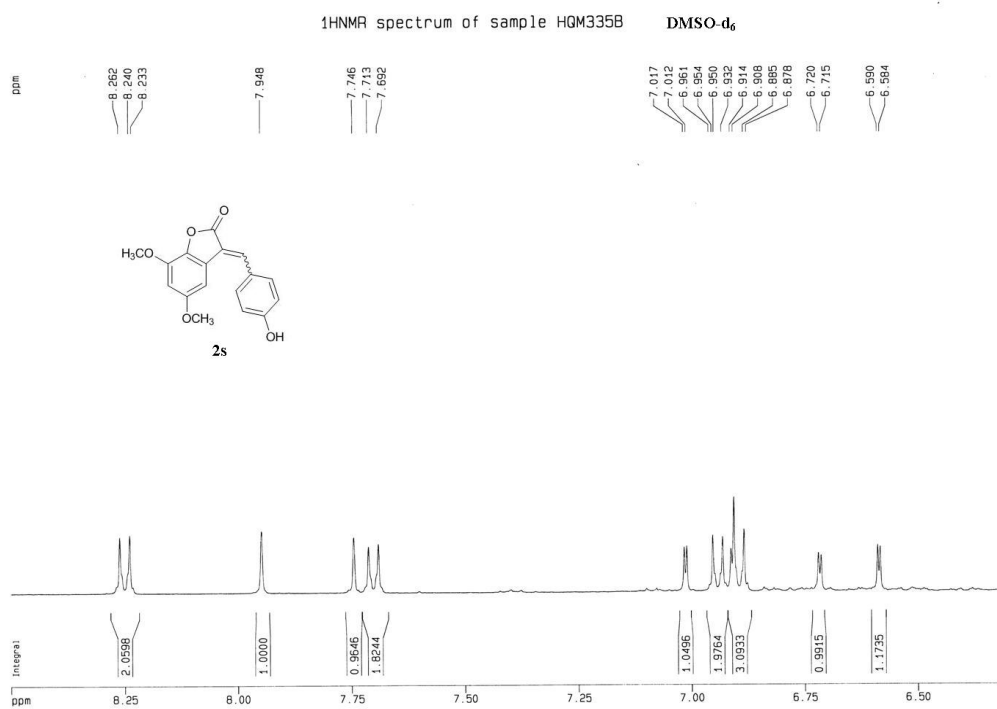

3-(4-hydroxybenzylidene)-5,7-dimethoxybenzofuran-2(3H)-one (2s)
